# Supplementary material for: Pd-catalyzed C–H activation in water: synthesis of bis(indolyl)methanes from indoles and benzyl alcohols
Source: Royal Society of Chemistry journal article supplement (doi:10.1039/c2ra21887a), 2012-11-21

## Supporting Information

### **Pd-Catalyzed C-H Activation in Water: Synthesis of Bis(Indolyl)methanes from Indoles and Benzyl Alcohols**

Hidemasa Hikawa\* and Yuusaku Yokoyama\*

*Faculty of Pharmaceutical Sciences, Toho University, Funabashi, Chiba 274-8510, Japan  
hidemasa.hikawa@phar.toho-u.ac.jp and yokoyama@phar.toho-u.ac.jp*

|                                                                                                                  |                |
|------------------------------------------------------------------------------------------------------------------|----------------|
| <b>1. Table of contents</b>                                                                                      | <b>S1</b>      |
| <b>2. General procedure</b>                                                                                      | <b>S2</b>      |
| <b>3. Characterization of 3a-3o</b>                                                                              | <b>S2-S5</b>   |
| <b>4. References</b>                                                                                             | <b>S5</b>      |
| <b>5. Copies of <sup>1</sup>H NMR spectrum (Scheme 2)</b>                                                        | <b>S6</b>      |
| <b>6. Copies of <sup>1</sup>H-NMR spectrum with product ratio calculation from integration.<br/>Scheme 3 (A)</b> | <b>S7-S9</b>   |
| <b>7. Copies of <sup>1</sup>H-NMR spectrum with product ratio calculation from integration.<br/>Scheme 3 (B)</b> | <b>S10-S11</b> |
| <b>8. Copies of <sup>1</sup>H and <sup>13</sup>C NMR spectra of the new compounds.</b>                           | <b>S12-S23</b> |

**General procedure:** A mixture of indole **1** (0.5 mmol), palladium(II) acetate (6 mg, 0.025 mmol), sodium diphenylphosphinobenzene-3-sulfonate (TPPMS, 18 mg, 0.05 mmol) and benzyl alcohol **2** (1.5 mmol) in H<sub>2</sub>O (2 mL) was heated at 60 °C for 16 h in a sealed tube. After cooling, the reaction mixture was poured into water and extracted with EtOAc. The organic layer was washed with brine, dried over MgSO<sub>4</sub> and concentrated in vacuo. The residue was purified by flash column chromatography (silica gel, hexanes/EtOAc) to give desired product **3**.

**Bis(5-methoxyindol-3-yl)(phenyl)methane 3a<sup>1</sup>**

Following the general procedure, **3a** was obtained as a white solid. 77 mg (81%); mp 213-216 °C; IR (KBr) (cm<sup>-1</sup>) 3392, 3319; <sup>1</sup>H NMR (400 MHz, CDCl<sub>3</sub>): δ 3.69 (s, 6H), 5.77 (s, 1H), 6.66 (dd, *J*=4.0, 2.0 Hz, 2H), 6.78-6.84 (m, 4H), 7.18-7.30 (m, 5H), 7.33-7.37 (m, 2H), 7.81 (brs, 2H); <sup>13</sup>C NMR (100 MHz, DMSO-*d*<sub>6</sub>): δ 40.3, 55.8, 102.0, 111.7, 111.9, 119.3, 124.4, 126.1, 127.5, 128.2, 128.7, 131.9, 143.9, 153.7; MS (EI): *m/z* (%) 382 (M<sup>+</sup>, 100).

**Bis(5-methoxyindol-3-yl)(4-methylphenyl)methane 3b<sup>2</sup>**

Following the general procedure, **3b** was obtained as a pale yellow solid. 59 mg (60%); mp 202-204 °C; IR (KBr) (cm<sup>-1</sup>) 3348; <sup>1</sup>H NMR (400 MHz, CDCl<sub>3</sub>): δ 2.32 (s, 3H), 3.69 (s, 6H), 5.73 (s, 1H), 6.66 (s, 2H), 6.80 (m, 4H), 7.08 (d, *J*=8.0 Hz, 2H), 7.20-7.25 (m, 4H), 7.80 (brs, 2H); <sup>13</sup>C NMR (100 MHz, CDCl<sub>3</sub>): δ ; 21.1, 39.9, 55.9, 102.0, 111.6, 111.8, 119.5, 124.4, 127.5, 128.6, 128.9, 131.9, 135.4, 140.9, 153.7; MS (EI): *m/z* (%) 396 (M<sup>+</sup>, 100).

**Bis(5-methoxyindol-3-yl)(4-ethylphenyl)methane 3c**

Following the general procedure, **3c** was obtained as a white solid. 100 mg (97%); mp 180-182 °C; IR (KBr) (cm<sup>-1</sup>) 3402; <sup>1</sup>H NMR (400 MHz, CDCl<sub>3</sub>): δ 1.21 (t, *J*=8.0 Hz, 3H), 2.62 (q, *J*=8.0 Hz, 2H), 3.68 (s, 6H), 5.73 (s, 1H), 6.66 (d, *J*=4.0 Hz, 2H), 6.78-6.84 (m, 4H), 7.10 (d, *J*=8.0 Hz, 2H), 7.20-7.28 (m, 4H), 7.79 (brs, 2H); <sup>13</sup>C NMR (100 MHz, CDCl<sub>3</sub>): δ 15.6, 28.5, 39.9, 55.8, 102.0, 111.6, 111.8, 119.6, 124.4, 127.6, 127.7, 128.6, 131.9, 141.1, 141.9, 153.7; MS (EI): *m/z* (%) 410 (M<sup>+</sup>, 100). Anal. Calcd for C<sub>27</sub>H<sub>26</sub>N<sub>2</sub>O<sub>2</sub>: C, 79.00; H, 6.38; N, 6.82. Found: C, 78.83; H, 6.43; N, 6.71.

**Bis(5-methoxyindol-3-yl)(4-methoxyphenyl)methane 3d<sup>3</sup>**

Following the general procedure, **3d** was obtained as an off-white solid. 67 mg (65%); mp 186-188 °C; IR (KBr) (cm<sup>-1</sup>) 3332; <sup>1</sup>H NMR (400 MHz, DMSO-*d*<sub>6</sub>): δ 3.59 (s, 6H), 3.71 (s, 3H), 5.68 (s, 1H), 6.65-7.00 (m, 8H), 7.20-7.30 (m, 4H), 10.6 (brs, 2H); <sup>13</sup>C NMR (100 MHz, DMSO-*d*<sub>6</sub>): δ 54.9, 55.2, 101.5, 110.4, 111.9, 113.3, 118.0, 124.2, 127.0, 129.2, 131.8, 137.0, 152.6, 157.3; MS (EI): *m/z* (%) 412 (M<sup>+</sup>, 100).

#### **Bis(5-methoxyindol-3-yl)(3-methylphenyl)methane 3e**

Following the general procedure, **3e** was obtained as a white solid. 93 mg (94%); mp 193-195 °C; IR (KBr) ( $\text{cm}^{-1}$ ) 3394;  $^1\text{H}$  NMR (400 MHz,  $\text{CDCl}_3$ ):  $\delta$  2.29 (s, 3H), 3.69 (s, 6H), 5.72 (s, 1H), 6.66 (dd,  $J=2.0$ , 0.4 Hz, 2H), 6.80-6.84 (m, 4H), 7.01 (t,  $J=6.8$  Hz, 1H), 7.10-7.20 (m, 3H), 7.20-7.26 (m, 2H), 7.80 (brs, 2H);  $^{13}\text{C}$  NMR (100 MHz,  $\text{CDCl}_3$ ):  $\delta$  21.5, 40.2, 55.9, 102.0, 111.6, 111.8, 119.4, 124.4, 125.7, 126.9, 127.6, 128.1, 129.4, 131.9, 137.6, 143.8, 153.7; MS (EI):  $m/z$  (%) 396 ( $\text{M}^+$ , 100); HRMS-EI:  $m/z$  ( $\text{M}^+$ ) calcd for  $\text{C}_{26}\text{H}_{24}\text{N}_2\text{O}_2$  396.1838, found 396.1837.

#### **Bis(5-methoxyindol-3-yl)(4-fluorophenyl)methane 3f<sup>d</sup>**

Following the general procedure, **3f** was obtained as a pale yellow solid. 73 mg (73%); mp 145-147 °C; IR (KBr) ( $\text{cm}^{-1}$ ) 3461, 3405;  $^1\text{H}$  NMR (400 MHz,  $\text{CDCl}_3$ ):  $\delta$  3.69 (s, 6H), 5.75 (s, 1H), 6.63 (d,  $J=2.0$  Hz, 2H), 6.77 (d,  $J=4.0$  Hz, 2H), 6.84 (dd,  $J=8.0$ , 4.0 Hz, 2H), 6.96 (t,  $J=8.0$  Hz, 2H), 7.20-7.35 (m, 2H), 7.83 (brs, 2H);  $^{13}\text{C}$  NMR (100 MHz,  $\text{CDCl}_3$ ):  $\delta$  39.5, 55.9, 101.9, 111.7, 112.0, 114.8, 115.1, 119.1, 124.4, 127.4, 130.0, 130.1, 131.9, 139.6, 139.6, 153.8, 160.2, 162.6; MS (EI):  $m/z$  (%) 400 ( $\text{M}^+$ , 100).

#### **Bis(5-methoxyindol-3-yl)(2-methylphenyl)methane 3g**

Following the general procedure, **3g** was obtained as a white solid. 86 mg (87%); mp 177-179 °C; IR (KBr) ( $\text{cm}^{-1}$ ) 3419;  $^1\text{H}$  NMR (400 MHz,  $\text{CDCl}_3$ ):  $\delta$  2.38 (s, 3H), 3.69 (s, 6H), 5.89 (s, 1H), 6.57 (d,  $J=2.0$  Hz, 2H), 6.76 (d,  $J=2.4$  Hz, 2H), 6.83 (dd,  $J=8.8$ , 2.4 Hz, 2H), 7.00-7.15 (m, 3H), 7.15-7.25 (m, 3H), 7.79 (brs, 2H);  $^{13}\text{C}$  NMR (100 MHz,  $\text{CDCl}_3$ ):  $\delta$  19.6, 36.4, 55.9, 102.0, 111.6, 111.7, 118.7, 124.7, 125.8, 126.1, 127.6, 128.4, 130.2, 131.9, 136.0, 141.9, 153.7; MS (EI):  $m/z$  (%) 396 ( $\text{M}^+$ , 100); Anal. Calcd for  $\text{C}_{26}\text{H}_{24}\text{N}_2\text{O}_2$ : C, 78.76; H, 6.10; N, 7.07. Found: C, 78.49; H, 6.11; N, 6.83.

#### **Bis(5-methoxyindol-3-yl)(2-thienyl)methane 3h**

Following the general procedure, **3h** was obtained as an off-white solid. 54 mg (56%); mp 190-192 °C; IR (KBr) ( $\text{cm}^{-1}$ ) 3390, 3325;  $^1\text{H}$  NMR (400 MHz,  $\text{CDCl}_3$ ):  $\delta$  3.71 (s, 6H), 6.05 (s, 1H), 6.80-6.86 (m, 4H), 6.88 (d,  $J=2.4$  Hz, 2H), 6.90-6.95 (m, 2H), 7.15 (dd,  $J=4.4$ , 1.6 Hz, 1H), 7.24 (dd,  $J=8.4$ , 0.4 Hz, 2H), 7.84 (brs, 2H);  $^{13}\text{C}$  NMR (100 MHz,  $\text{CDCl}_3$ ):  $\delta$  35.4, 55.9, 101.8, 111.8, 112.0, 119.3, 123.6, 124.0, 125.2, 126.4, 127.2, 131.8, 148.6, 153.8; MS (EI):  $m/z$  (%) 388 ( $\text{M}^+$ , 100); Anal. Calcd for  $\text{C}_{23}\text{H}_{20}\text{N}_2\text{O}_2\text{S}$ : C, 71.11; H, 5.19; N, 7.21. Found: C, 70.76; H, 5.09; N, 6.98.

#### **Bis(indol-3-yl)(phenyl)methane 3i<sup>5</sup>**

Following the general procedure, **3i** was obtained as a brown solid. 47 mg (58%); mp 141-143 °C; IR (KBr) ( $\text{cm}^{-1}$ ) 3398;  $^1\text{H}$  NMR (400 MHz,  $\text{CDCl}_3$ ):  $\delta$  5.87 (s, 1H), 6.59 (s, 2H), 6.99 (dd,  $J=8.0$ , 8.0 Hz, 2H), 7.15 (dd,  $J=8.0$ , 8.0 Hz, 2H), 7.18-7.40 (m, 9H), 7.78 (brs, 2H);  $^{13}\text{C}$  NMR (100 MHz,  $\text{CDCl}_3$ ):  $\delta$  40.2, 111.0, 119.2, 119.7, 119.9, 121.9, 123.6, 126.1, 127.1, 128.2, 128.7, 136.7, 144.0; MS (EI):  $m/z$  (%) 322

(M<sup>+</sup>, 100).

**Bis(5-methylindol-3-yl)(phenyl)methane 3j<sup>6</sup>**

Following the general procedure, **3j** was obtained as a brown solid. 65 mg (74%); mp 183-185 °C; IR (KBr) (cm<sup>-1</sup>) 3422; <sup>1</sup>H NMR (400 MHz, CDCl<sub>3</sub>): δ 2.34 (s, 6H), 5.82 (s, 1H), 6.57 (d, *J*=4.0 Hz, 2H), 6.99 (d, *J*=8.0 Hz, 2H), 7.15-7.40 (m, 9H), 7.79 (brs, 2H); <sup>13</sup>C NMR (100 MHz, CDCl<sub>3</sub>): δ 21.5, 40.0, 110.7, 119.3, 119.5, 123.5, 123.9, 126.0, 127.3, 128.2, 128.4, 128.7, 135.0, 144.2; MS (EI): *m/z* (%) 350 (M<sup>+</sup>, 100).

**Bis(5-fluoroindol-3-yl)(phenyl)methane 3k**

Following the general procedure, **3k** was obtained as an off-white solid. 50 mg (56%); mp 169-171 °C; IR (KBr) (cm<sup>-1</sup>) 3465, 3424; <sup>1</sup>H NMR (400 MHz, CDCl<sub>3</sub>): δ 5.73 (s, 1H), 6.72 (s, 2H), 6.90 (td, *J*=9.2, 2.4 Hz, 2H), 6.98 (dd, *J*=9.2, 2.4 Hz, 2H), 7.20-7.35 (m, 7H), 7.93 (brs, 2H); <sup>13</sup>C NMR (100 MHz, CDCl<sub>3</sub>): δ 40.2, 104.7, 104.9, 110.3, 110.5, 111.6, 111.7, 119.5, 119.5, 125.2, 126.4, 127.3, 127.4, 128.4, 128.6, 133.2, 143.2, 156.4, 158.7; MS (EI): *m/z* (%) 358 (M<sup>+</sup>, 100); HRMS-EI: *m/z* (M<sup>+</sup>) calcd for C<sub>23</sub>H<sub>16</sub>F<sub>2</sub>N<sub>2</sub> 358.1282, found 358.1283.

**Bis(5-cyanoindol-3-yl)(phenyl)methane 3l<sup>7</sup>**

Following the general procedure, **3l** was obtained as an off-white solid. 84 mg (90%); mp 246-249 °C; IR (KBr) (cm<sup>-1</sup>) 3319, 2220; <sup>1</sup>H NMR (400 MHz, CDCl<sub>3</sub>): δ 5.84 (s, 1H), 6.81 (s, 2H), 7.25-7.35 (m, 5H), 7.40-7.45 (m, 4H), 7.67 (s, 2H), 8.34 (brs, 2H); <sup>13</sup>C NMR (100 MHz, CDCl<sub>3</sub>): δ 40.0, 102.7, 112.2, 119.9, 120.7, 125.2, 125.5, 126.6, 127.0, 128.4, 128.7, 138.4, 142.2; MS (EI): *m/z* (%) 372 (M<sup>+</sup>, 100).

**Bis(5-carbomethoxyindol-3-yl)(phenyl)methane 3m**

Following the general procedure, **3l** was obtained as an off-white solid. 92 mg (84%); mp 226-228 °C; IR (KBr) (cm<sup>-1</sup>) 3325, 1689; <sup>1</sup>H NMR (400 MHz, DMSO-d<sub>6</sub>): δ 3.76 (s, 6H), 6.02 (s, 1H), 6.88 (s, 2H), 7.21 (dd, *J*=7.2, 7.2 Hz, 1H), 7.30 (dd, *J*=7.6, 7.6 Hz, 2H), 7.35 (d, *J*=7.2 Hz, 2H), 7.45 (d, *J*=8.8 Hz, 2H), 7.70 (dd, *J*=8.4, 1.2 Hz, 2H), 8.02 (s, 2H), 11.3 (brs, 2H); <sup>13</sup>C NMR (100 MHz, DMSO-d<sub>6</sub>): δ 51.6, 111.5, 119.4, 119.8, 121.7, 122.1, 125.6, 126.1, 126.1, 128.2, 139.3, 144.2, 167.2; MS (EI): *m/z* (%) 438 (M<sup>+</sup>, 100); HRMS-EI: *m/z* (M<sup>+</sup>) calcd for C<sub>27</sub>H<sub>22</sub>N<sub>2</sub>O<sub>4</sub> 438.1580, found 438.1579.

**Bis(2-methylindol-3-yl)(phenyl)methane 3n<sup>5</sup>**

Following the general procedure, **3l** was obtained as a brown solid. 86 mg (98%); mp 251-254 °C; IR (KBr) (cm<sup>-1</sup>) 3395; <sup>1</sup>H NMR (400 MHz, CDCl<sub>3</sub>): δ 2.06 (s, 6H), 6.00 (s, 1H), 6.85 (dd, *J*=8.0, 8.0 Hz, 2H), 6.97 (d, *J*=8.0 Hz, 2H), 7.03 (dd, *J*=8.0, 8.0 Hz, 2H), 7.20-7.30 (m, 7H), 7.73 (brs, 2H); <sup>13</sup>C NMR (100

MHz, CDCl<sub>3</sub>): δ 12.4, 39.3, 109.9, 113.4, 119.1, 119.3, 120.6, 126.0, 128.1, 129.0, 129.1, 131.8, 135.0, 143.7; MS (EI): *m/z* (%) 350 (M<sup>+</sup>, 98.8), 130 (100).

#### **Bis(1-methylindol-3-yl)(phenyl)methane 3o<sup>5</sup>**

Following the general procedure, **3I** was obtained as an off-white solid. 64 mg (73%); mp 199-201 °C; IR (KBr) (cm<sup>-1</sup>) 1473; <sup>1</sup>H NMR (400 MHz, CDCl<sub>3</sub>): δ 3.66 (s, 6H), 5.88 (s, 1H), 6.52 (s, 2H), 6.98 (dd, *J*=8.0, 6.0 Hz, 2H), 7.16-7.30 (m, 7H), 7.32-7.40 (m, 4H); <sup>13</sup>C NMR (100 MHz, CDCl<sub>3</sub>): δ 32.7, 40.1, 190.0, 118.2, 118.6, 120.0, 121.4, 126.0, 127.4, 128.2, 128.2, 128.7, 137.4, 144.4; MS (EI): *m/z* (%) 350 (M<sup>+</sup>, 100).

#### References

- (1) S. Whitney, R. Grigg, A. Derrick, A. Keep, *Org. Lett.* 2007, **9**, 3299–3302.
- (2) S. A. R. Mulla, A. Sudalai, M. Y. Pathan, S. A. Siddique, S. M. Inamdar, S. S. Chavan, R. S. Reddy, *RSC Advances*, 2012, **2**, 3525–3529.
- (3) M. Chakrabarty, A. Mukherji, S. Karmakar, S. Arima, Y. Harigaya, *Heterocycles*, 2006, **68**, 331-338.
- (4) W.-J. Li, X.-F. Lin, J. Wang, G.-L. Li, Y.-G. Wang, *Synth. Commun.* 2005, **35**, 2765-2769.
- (5) B.-S. Liao, J.-T. Chen, S.-T. Liu, *Synthesis* 2007, 3125–3128.
- (6) J. Yang, Z. Wang, F. Pan, Y. Li, W. Bao, *Org. Biomol. Chem.* 2010, **8**, 2975-2978.
- (7) M. M. Heravi, K. Bakhtiari, A. Fatehi, F. F. Bamoharram, *Catalysis Commun.* 2008, **9**, 289-292.

### Scheme 2. C-H bond Activation at the C3-position of indole 1a.<sup>a</sup>

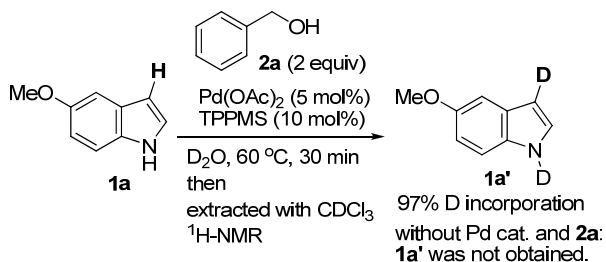

A mixture of **1a** (37 mg, 0.25 mmol), palladium(II) acetate (3 mg, 0.0125 mmol), sodium diphenylphosphinobenzene-3-sulfonate (TPPMS, 9 mg, 0.025 mmol) and benzyl alcohol **2a** (54 mg, 0.5 mmol) in D<sub>2</sub>O (0.75 mL) was heated at 60 °C for 30 min in a sealed tube. After cooling, the reaction mixture was extracted with CDCl<sub>3</sub> (8 mL), then the organic layer was analyzed by <sup>1</sup>H-NMR spectroscopy.

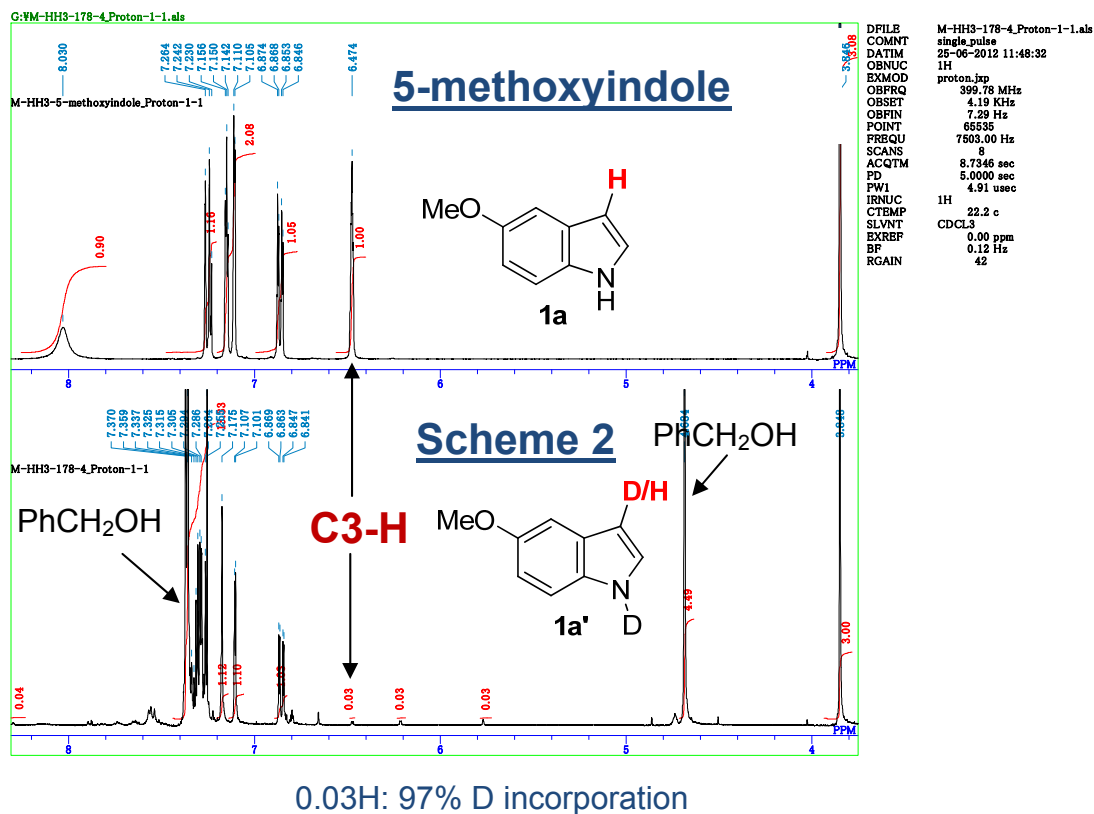

**Scheme 3 (A). <sup>1</sup>H NMR experiments to monitor the reaction.**

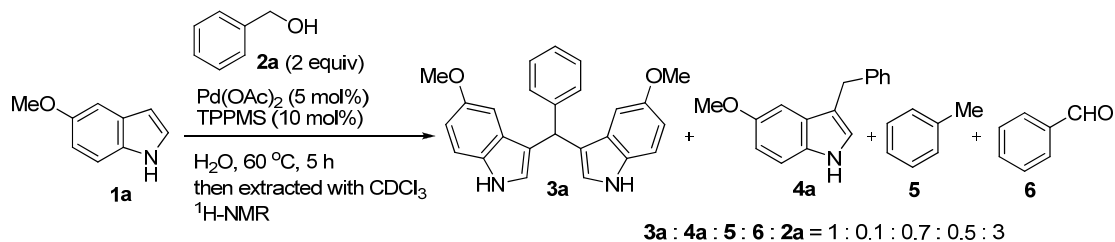

A mixture of **1a** (74 mg, 0.5 mmol), palladium(II) acetate (6 mg, 0.025 mmol), sodium diphenylphosphinobenzene-3-sulfonate (TPPMS, 18 mg, 0.05 mmol) and benzyl alcohol **2a** (108 mg, 1.0 mmol) in H<sub>2</sub>O (2 mL) was heated at 60 °C for 5 h in a sealed tube. After cooling, the reaction mixture was extracted with CDCl<sub>3</sub> (8 mL), then the organic layer was analyzed by <sup>1</sup>H-NMR spectroscopy.

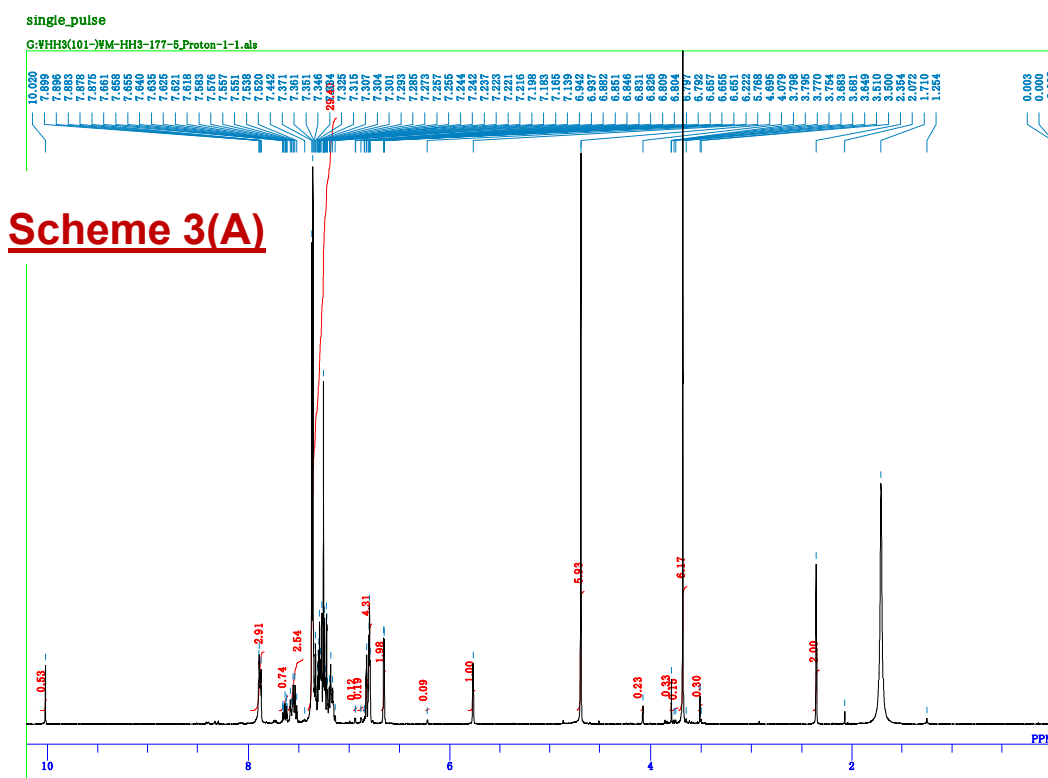

Product ratio was determined by integration.

|                  | desired<br><b>3a</b>      | 3-benzylated<br><b>4a</b>        | toluene<br><b>5</b>             | benzaldehyde<br><b>6</b> | PhCH <sub>2</sub> OH<br><b>2a</b> |
|------------------|---------------------------|----------------------------------|---------------------------------|--------------------------|-----------------------------------|
| Signal δ         | 5.76 (methine- <b>H</b> ) | 3.79 (O <b>CH</b> <sub>3</sub> ) | 2.35 ( <b>CH</b> <sub>3</sub> ) | 10.0 ( <b>CHO</b> )      | 4.69 ( <b>CH</b> <sub>2</sub> )   |
| Integral value   | 1.00 (1H)                 | 0.33 (3H)                        | 2.00 (3H)                       | 0.53 (1H)                | 5.93 (2H)                         |
| Calculated ratio | 1                         | 0.1                              | 0.7                             | 0.5                      | 3                                 |

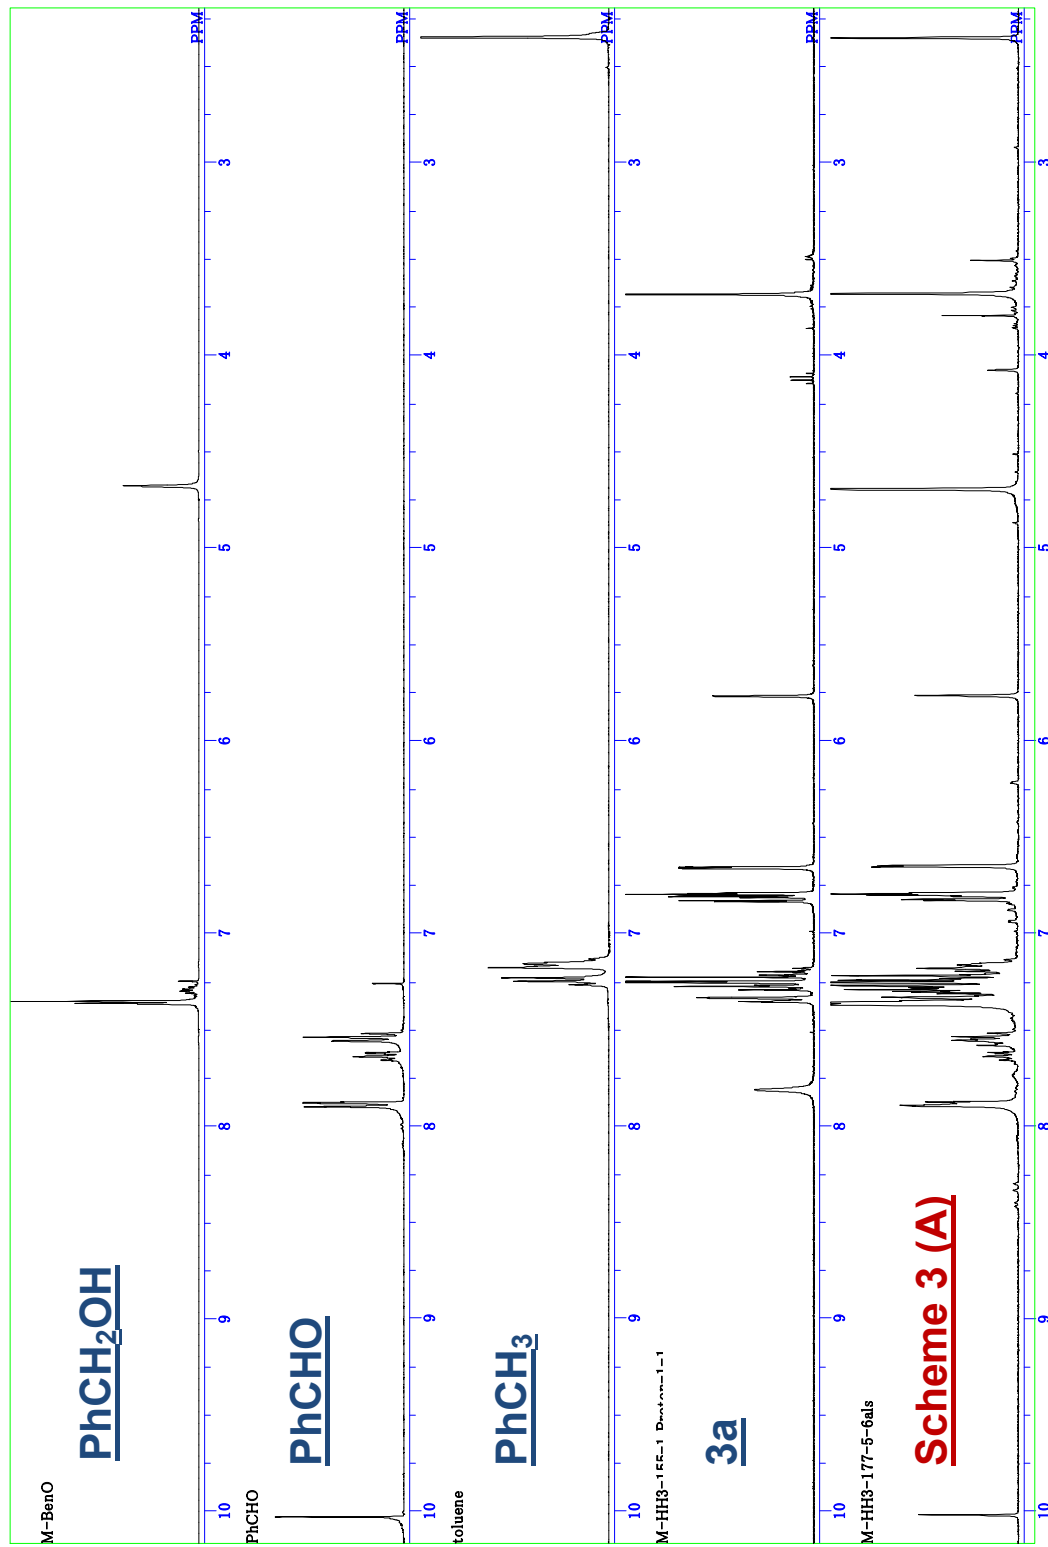

10

S8

3 (ppm)



### Scheme 3 (A) (Expansion)

<sup>1</sup>H-NMR spectrum in Scheme 3 (A) was expanded for detection of 3-benzyl-5-methoxy-1*H*-indole 4a.

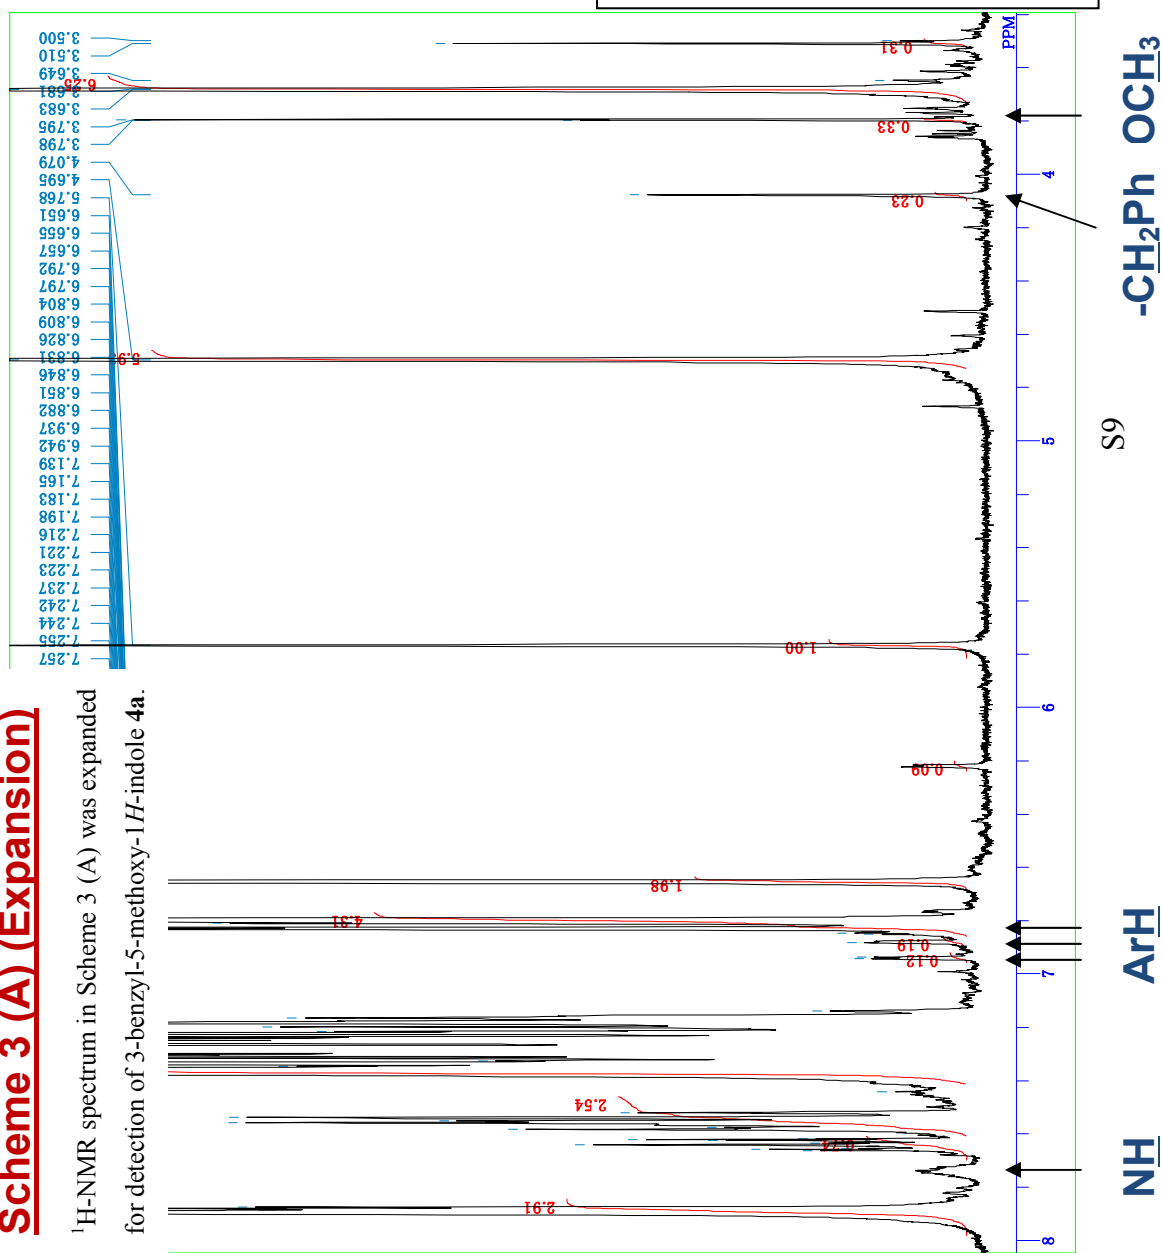

M-HH3-177-5-3.als  
 single\_pulse  
 15-06-2012 10:25:04  
 1H  
 proton\_kp  
 399.78 MHz  
 4.19 KHz  
 7.23 Hz  
 26214  
 6002.40 Hz  
 8  
 4.3673 sec  
 5.0000 sec  
 4.91 usec  
 1H  
 22.4 c  
 CDCL3  
 0.00 ppm  
 0.12 Hz  
 40

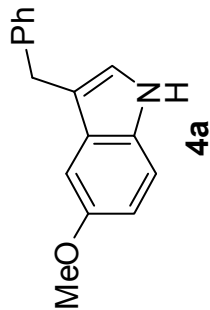

Ref Whitney, S.; Grigg, R.; Derrick, A.; Keep, A. *Org. Lett.* **2007**, *9*, 3299–3302.

#### 3-Benzyl-5-methoxy-1*H*-indole

<sup>1</sup>H NMR (500 MHz, CDCl<sub>3</sub>): δ 3.78 (s, 3H, CH<sub>3</sub>), 4.06 (s, 2H, CH<sub>2</sub>), 6.81 (d, 1H, *J*=2.1 Hz), 6.83 (dd, 1H, *J*=2.1, 8.8 Hz), 6.94 (d, 1H, *J*= 2.1 Hz), 7.19-7.16 (m, 2H), 7.28-7.24 (m, 4H), 7.76 (br s, 1H, NH)

**Scheme 3 (B).**  $^1\text{H}$  NMR experiments to monitor the reaction.

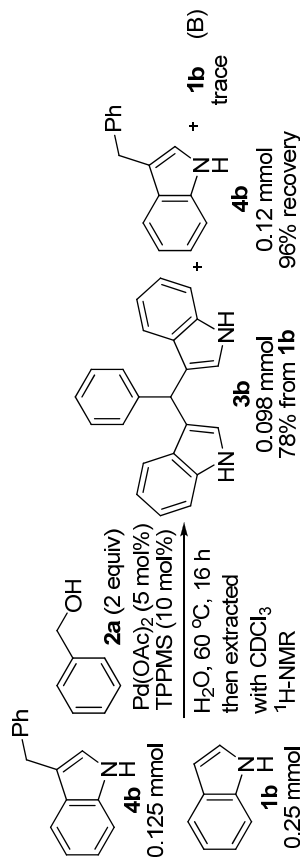

A mixture of 3-benzylindole **4b** (26 mg, 0.125 mmol), **1b** (30 mg, 0.25 mmol), palladium(II) acetate (3 mg, 0.0125 mmol), sodium diphenylphosphinobenzene-3-sulfonate (TPPMS, 9 mg, 0.025 mmol) and benzyl alcohol **2a** (77  $\mu\text{L}$ , 0.7 mmol) in H<sub>2</sub>O (2 mL) was heated at 60 °C for 16 h in a sealed tube. After the reaction mixture was cooled, *p*-nitroanisole (19 mg, 0.125 mmol, internal standard) was added to the reaction mixture, which was extracted with CDCl<sub>3</sub> (10 mL), then the organic layer was analyzed by  $^1\text{H}$ -NMR spectroscopy.

Conversion yield and recovery were calculated by integration.

|                  |                                        |                                             |                                                            |
|------------------|----------------------------------------|---------------------------------------------|------------------------------------------------------------|
|                  | desired                                | 3-benzylindole                              | <i>p</i> -nitroanisole                                     |
| Signal $\delta$  | <b>3b</b><br>5.89 (methine- <b>H</b> ) | <b>4b</b><br>4.12 ( <b>CH<sub>2</sub></b> ) | <b>internal standard</b><br>8.21 (Ar- <b>H</b> $\times$ 2) |
| Integral value   | 0.78 (1H)                              | 1.92 (2H)                                   | 2.0 (2H)                                                   |
| Calculated ratio | 0.098 mmol<br>78% from <b>1b</b>       | 0.12 mmol<br>96% recovery                   | 19 mg (0.125 mmol)                                         |

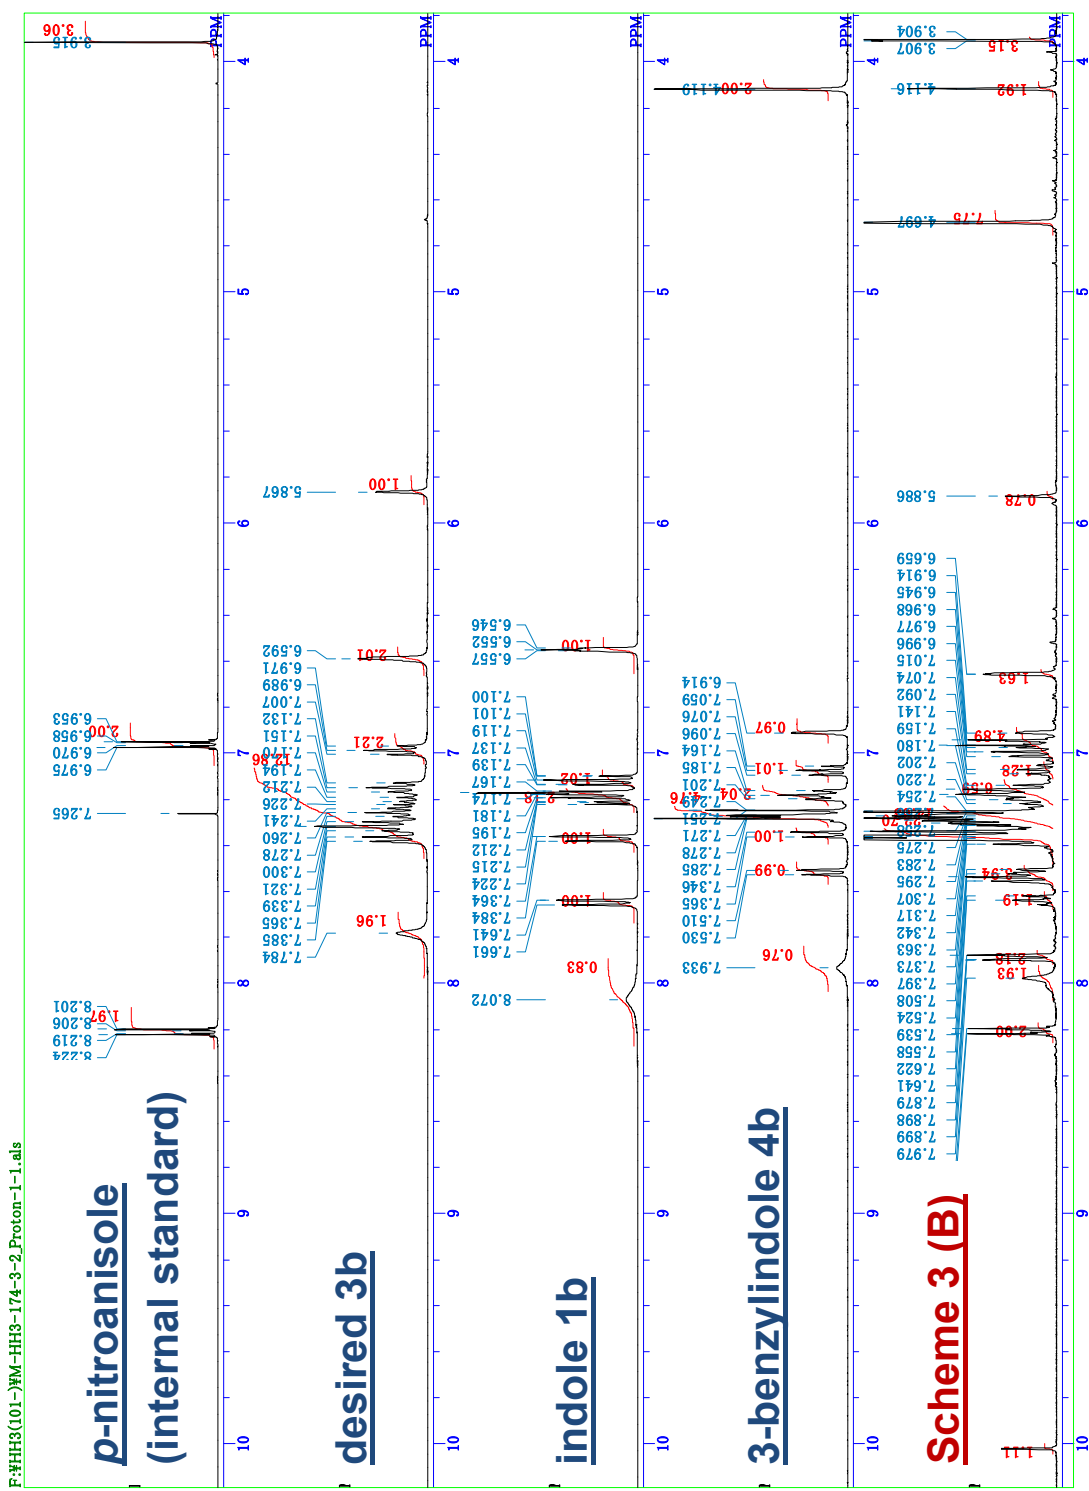

single\_pulse

F:\HH3(101)\WM-HH3-164-4\_Proton-1-1.als

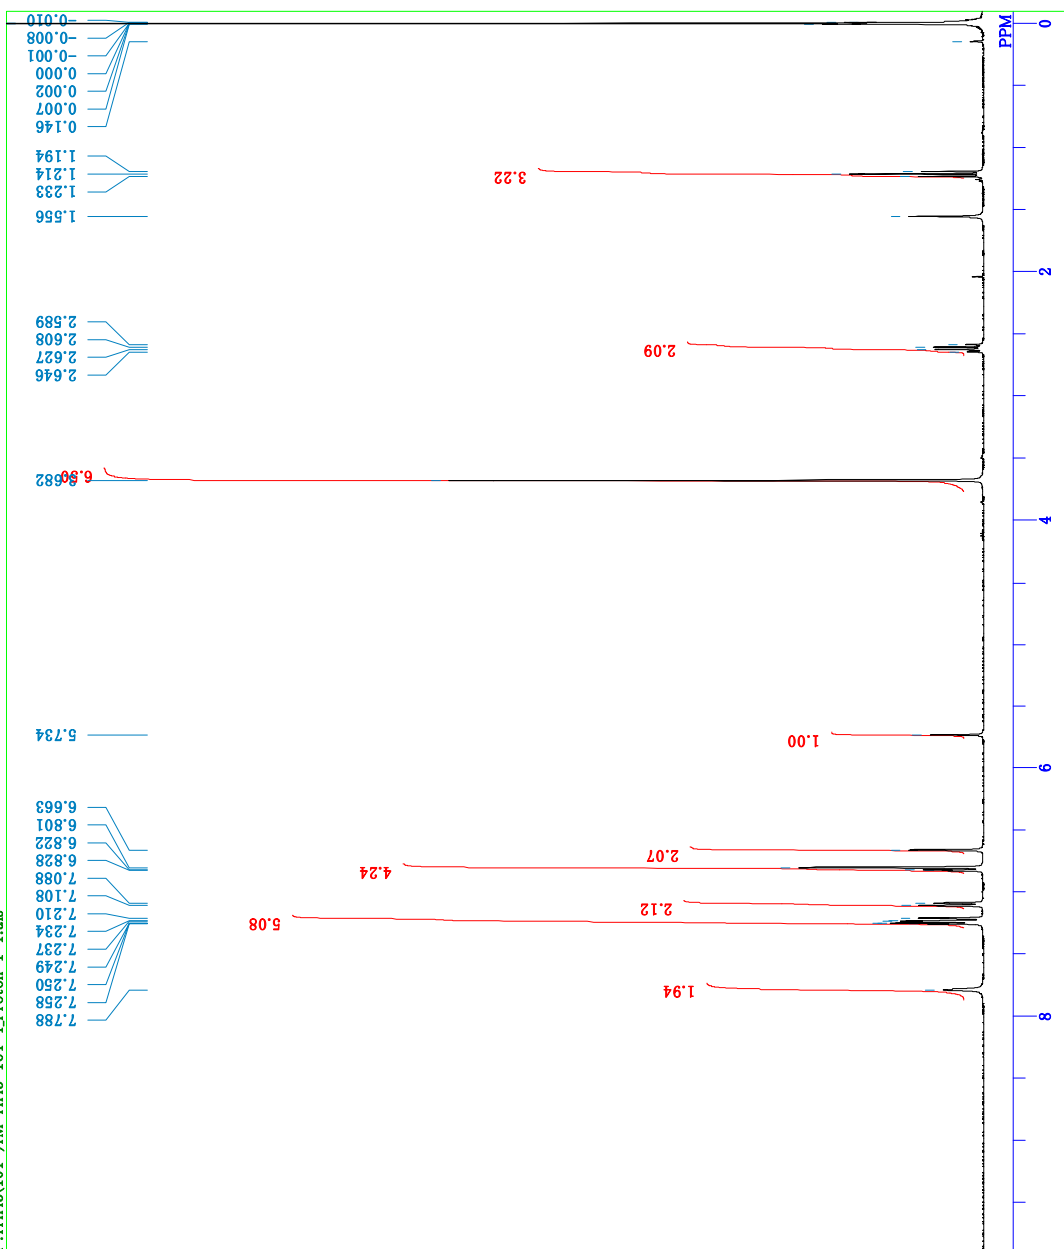

DRIFL  
COMNT  
DATIM  
OBNUC  
EXMOD  
OBFRQ  
OBSET  
OBFIN  
POINT  
FREQU  
SCANS  
ACQTIM  
PD  
PW1  
IRNUC  
CTEMP  
SLVNT  
EXREF  
BF  
RGAIN

M-HH3-164-4\_Proton-1-1.als  
single\_pulse  
29-08-2012 23:25:10  
1H  
proton.fxp  
399.78 MHz  
4.19 KHz  
7.29 Hz  
52428  
6002.40 Hz  
6  
8.7346 sec  
5.0000 sec  
4.91 usec  
1H  
23.3 c  
CDCL3  
0.00 ppm  
0.12 Hz  
38

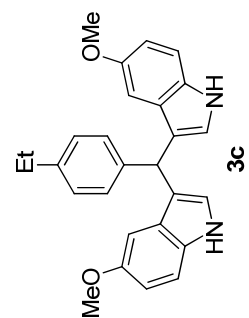

single pulse decoupled gated NOE

F:\HH3(101-)\HM-HH3-164-4\_Carbon-1-1.als

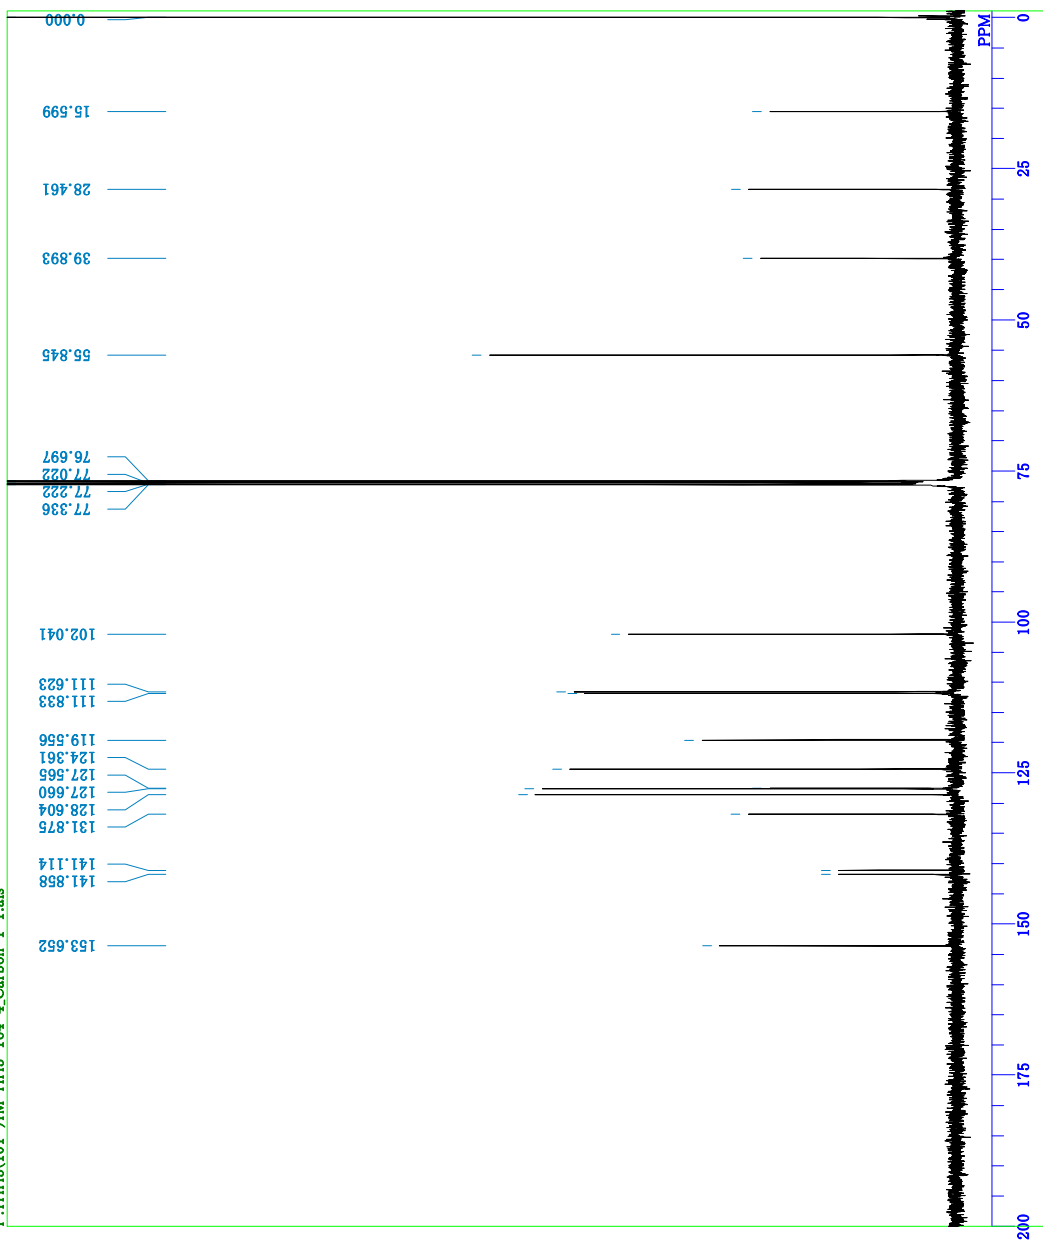

DFILE  
 COMNT  
 DATIM  
 OBNUC  
 EXMOD  
 OBRFQ  
 OBSET  
 OBFIN  
 POINT  
 FREQU  
 SCANS  
 ACQTM  
 PD  
 PW1  
 IRNUC  
 CTEMP  
 SLVNT  
 EXREF  
 BF  
 RGAIN

M-HH3-164-4\_Carbon-1-1.als  
 single pulse decoupled gated NOE  
 29-05-2012 23:29:37  
 13C  
 carbon.kfp  
 100.63 MHz  
 5.35 KHz  
 5.86 Hz  
 26214  
 25125.63 Hz  
 2048  
 1.0433 sec  
 2.0000 sec  
 2.67 usec  
 1H  
 22.1 c  
 CDCL3  
 0.00 ppm  
 1.20 Hz  
 60

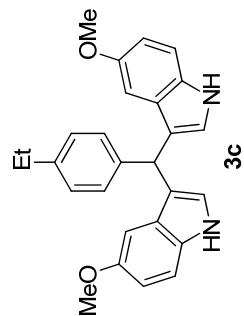

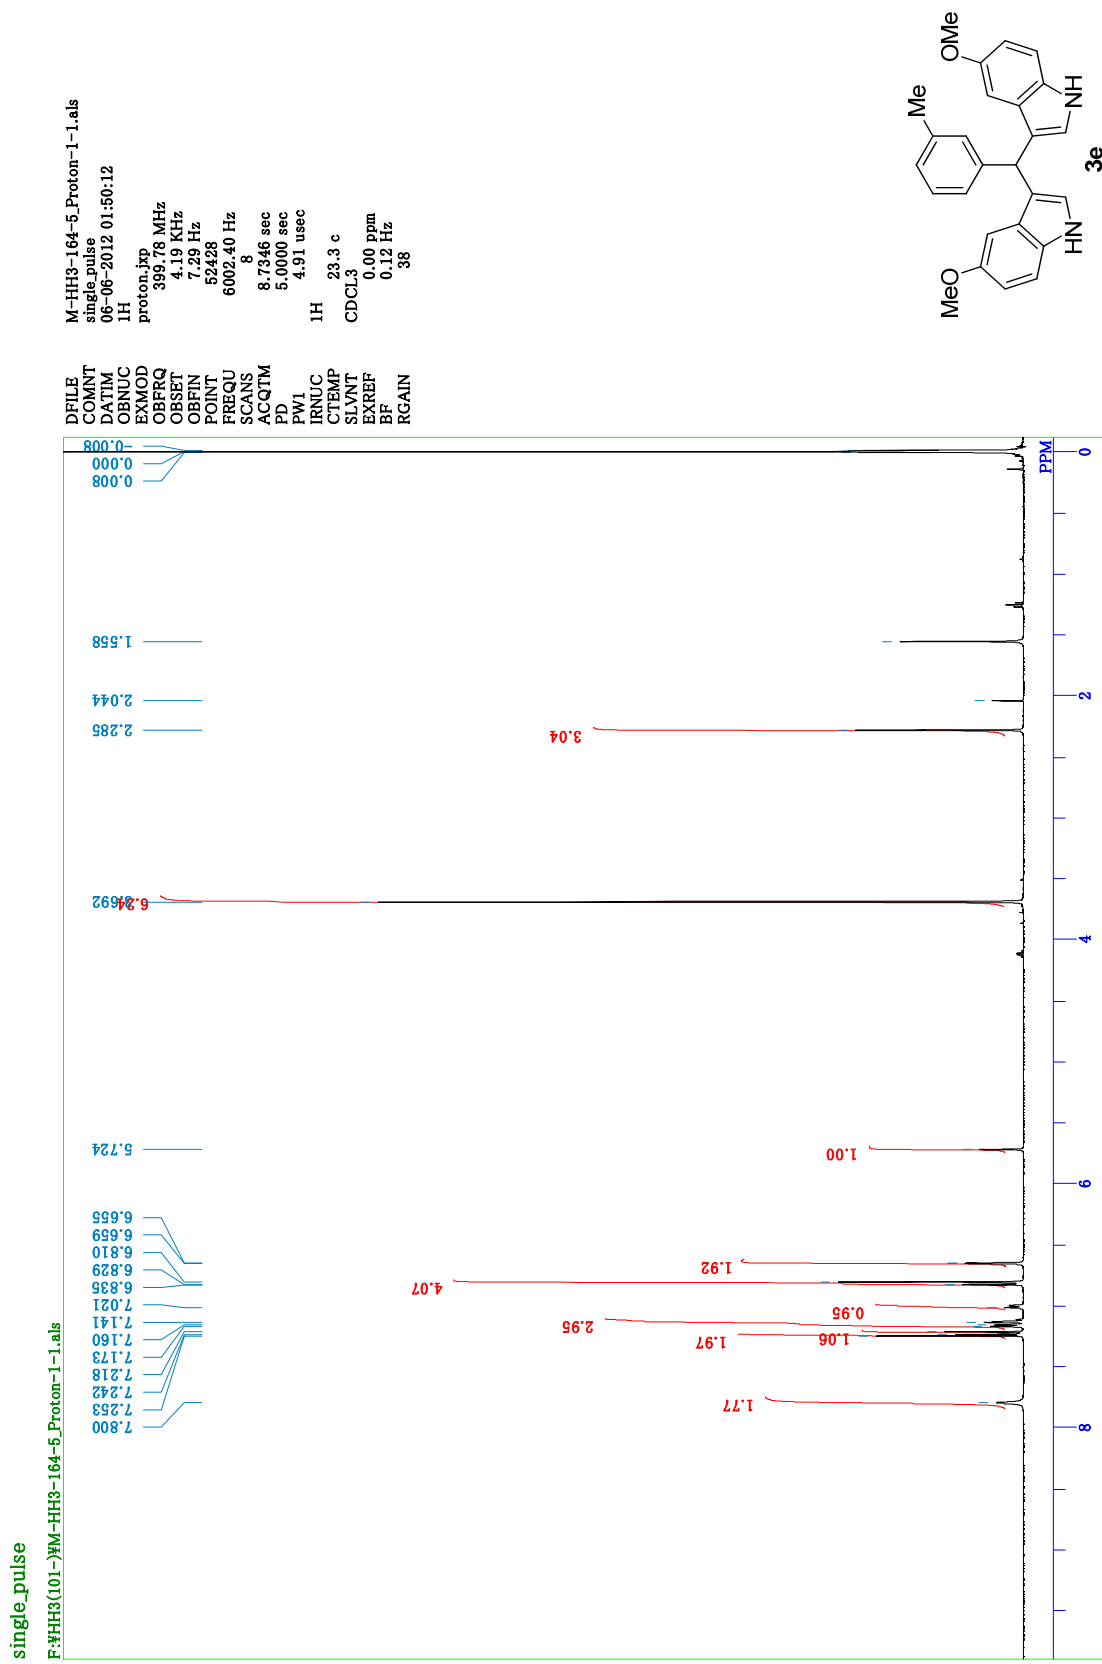

single pulse decoupled gated NOE

F:\HH3(101-)\M-HH3-164-5\_Carbon-1-1.als

DFILE  
 COMNT  
 DATIM  
 OBNUC  
 EXMOD  
 OBFREQ  
 OBFSET  
 OBFIN  
 POINT  
 FREQU  
 SCANS  
 ACQTM  
 PD  
 PW1  
 IRNUC  
 CTMP  
 SLVNT  
 EXREF  
 BF  
 RGAIN

M-HH3-164-5\_Carbon-1-1.als  
 single pulse decoupled gated NOE  
 06-06-2012 01:54:33  
 13C  
 carbon.jrp

100.53 MHz  
 5.35 KHz  
 5.86 Hz  
 26214  
 25125.63 Hz  
 2048  
 1.0433 sec  
 2.0000 sec  
 2.67 usec  
 1H  
 22.5 c  
 CDCL3  
 0.00 ppm  
 1.20 Hz  
 60

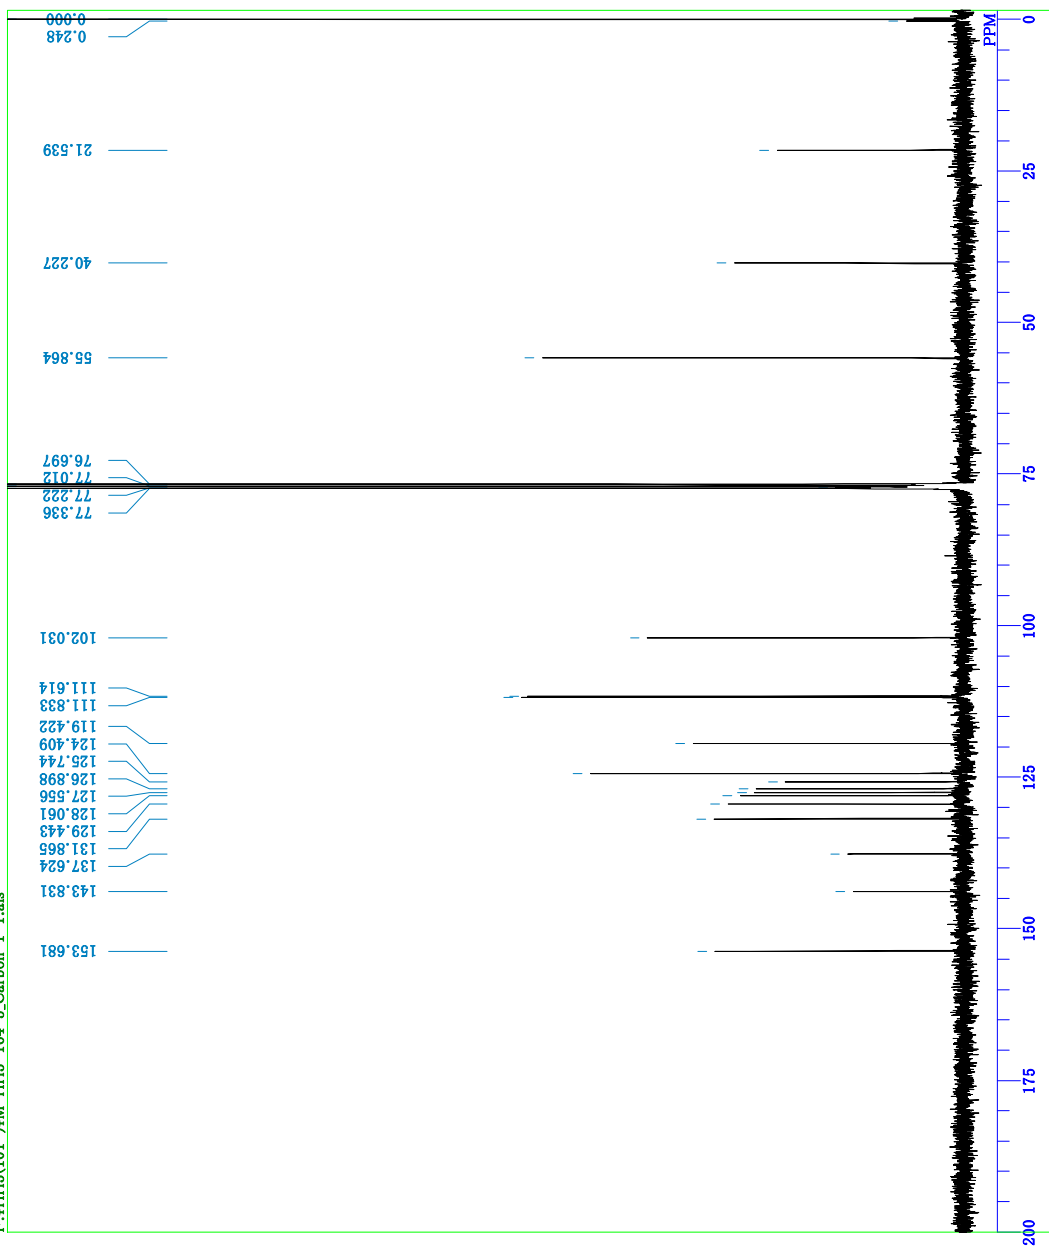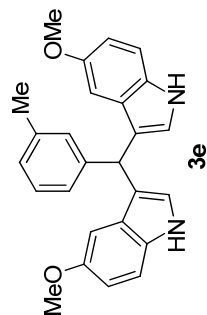

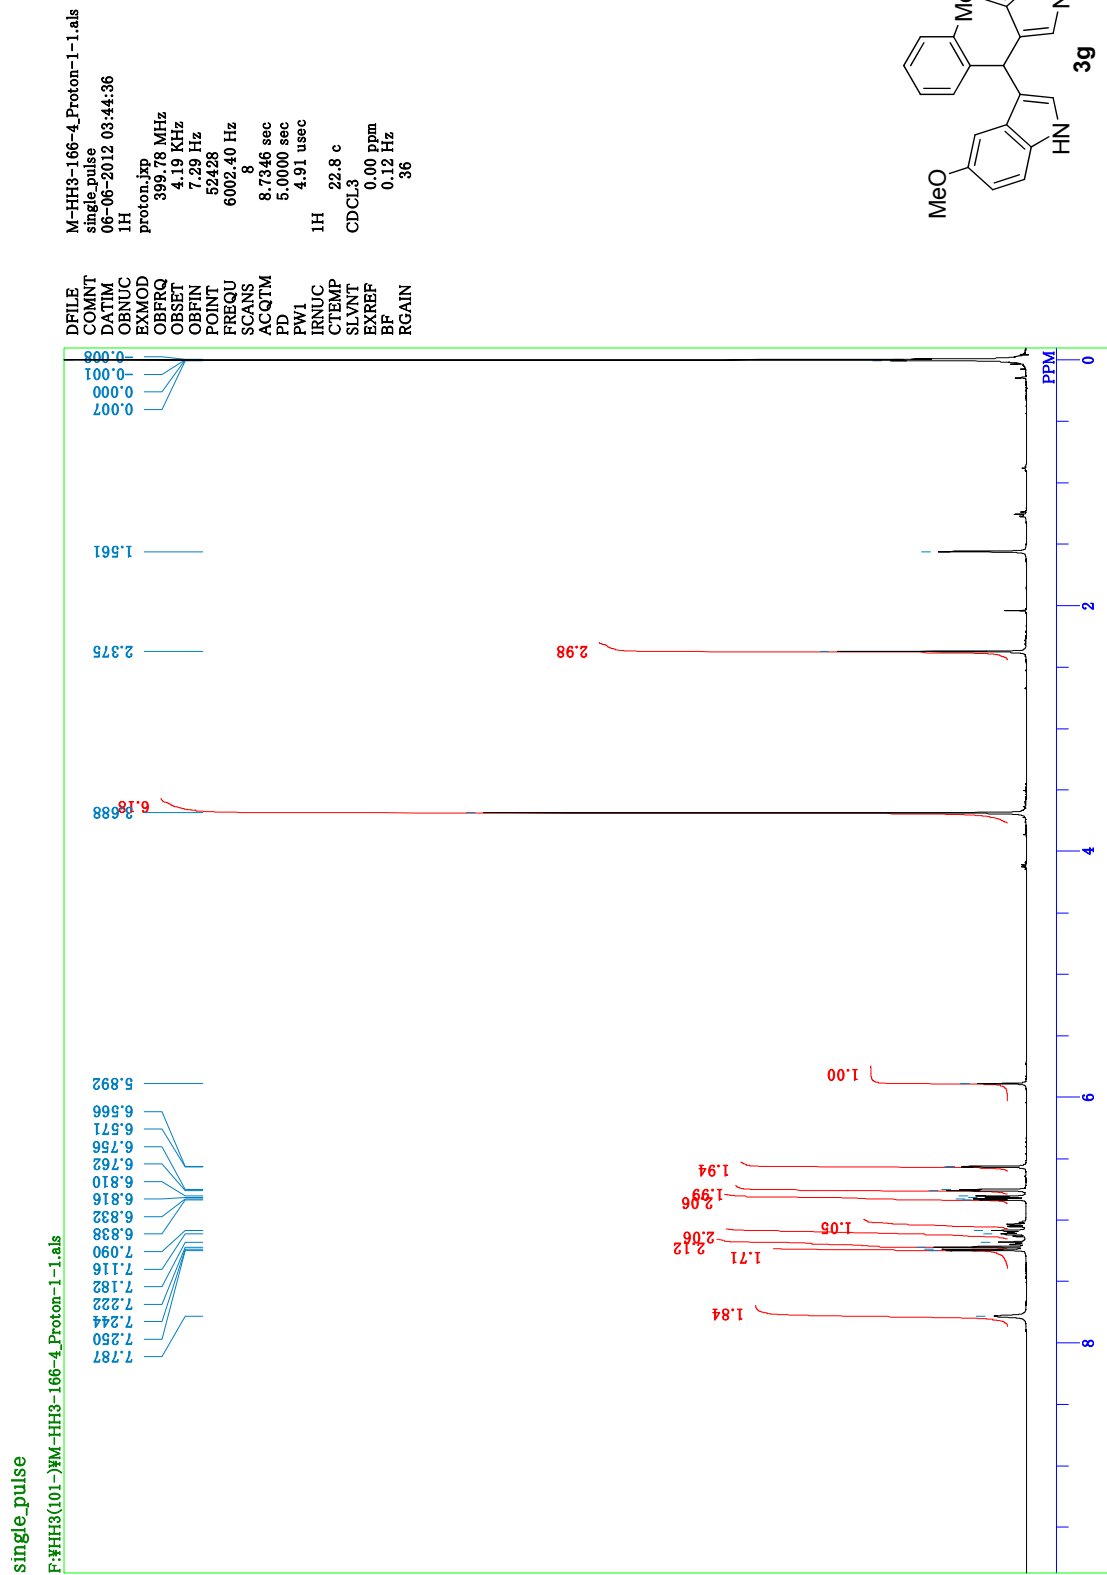



single pulse decoupled gated NOE

F:\HH3(101-)\MM-HH3-166-4\_Carbon-1-1.als

M-HH3-166-4\_Carbon-1-1.als  
 single pulse decoupled gated NOE

06-06-2012 03:49:16  
 13C  
 carbon.kjp  
 EXMOD 100.63 MHz  
 OBFRQ 5.35 KHz  
 OBSET 5.86 Hz  
 OBFIN 26214  
 POINT 25125.63 Hz  
 FREQU 2048  
 SCANS 1.0433 sec  
 PD 2.0000 sec  
 PW1 2.67 usec  
 1H 22.6 c  
 CDCL3  
 CTEMP 0.00 ppm  
 SLVNT 1.20 Hz  
 EXREF  
 BF  
 RGAIN 60

DFILE  
 COMNT  
 DATM  
 OBNUC  
 EXMOD  
 OBFRQ  
 OBSET  
 OBFIN  
 POINT  
 FREQU  
 SCANS  
 ACQTM  
 PD  
 PW1  
 IRNUC  
 CTEMP  
 SLVNT  
 EXREF  
 BF  
 RGAIN

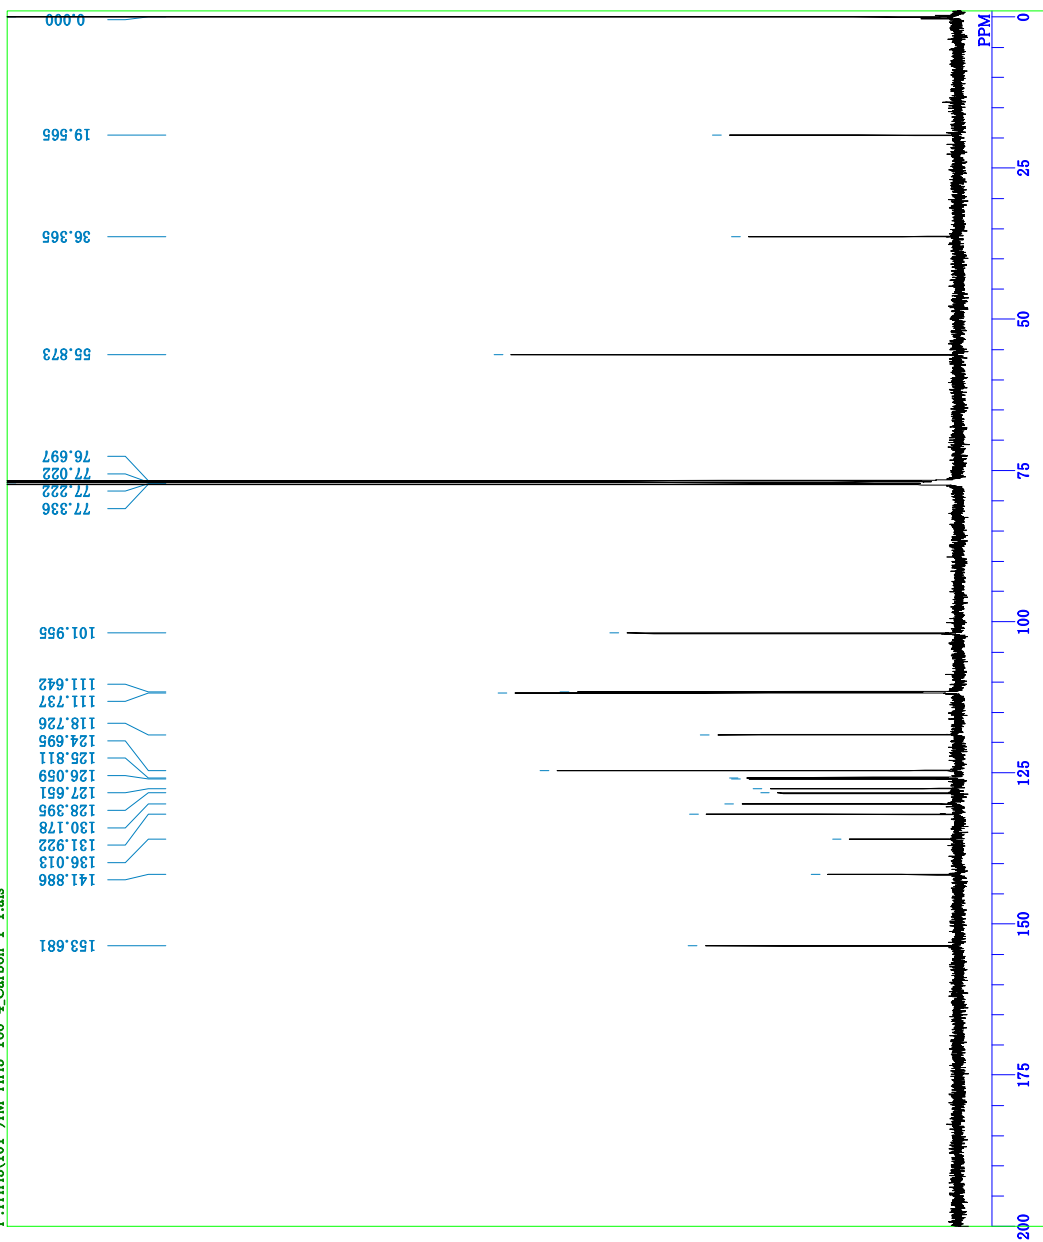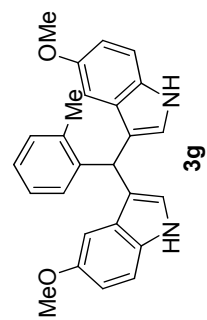

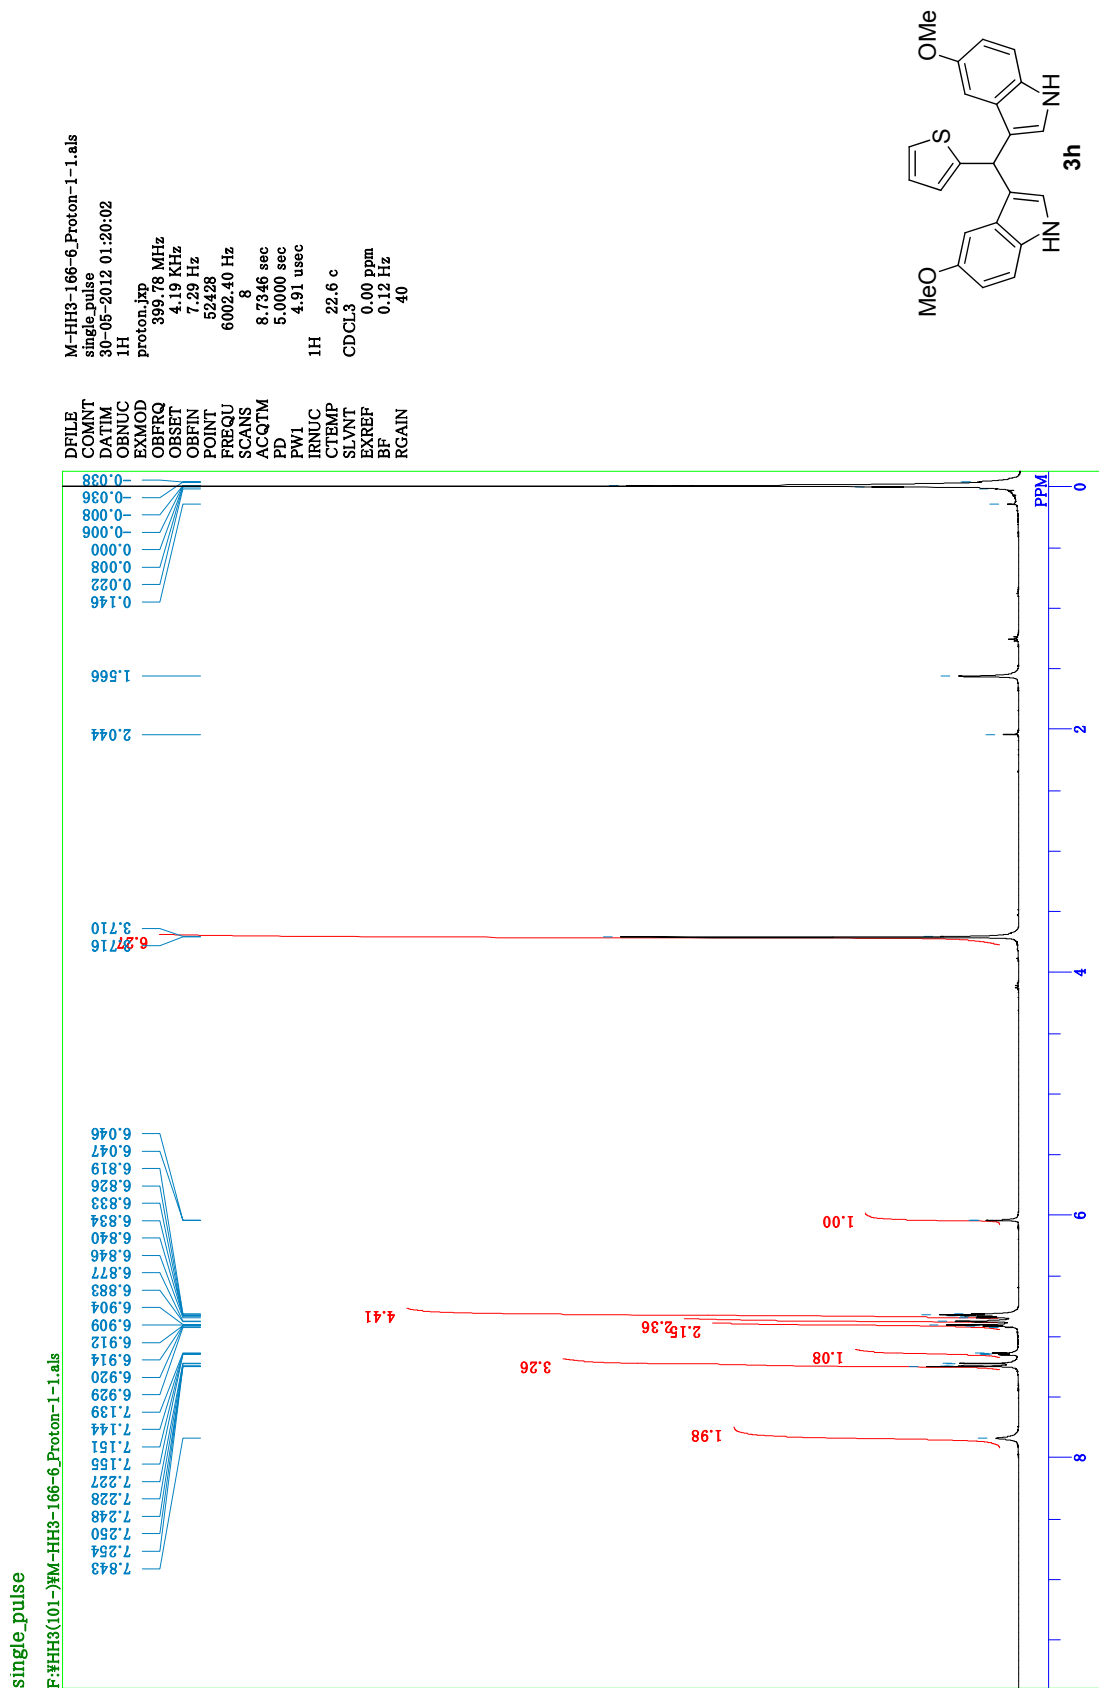

single pulse decoupled gated NOE

F:\HH3(101)\M-HH3-166-6\_Carbon-1-1.als

DFILE  
COMNT  
DATIM  
OBNUC  
EXMOD  
OBREQ  
OBSET  
OBFIN  
POINT  
FREQU  
SCANS  
ACQTM  
PD  
PW1  
IRNUC  
CTEMP  
SLVNT  
EXREF  
BF  
RGAIN

M-HH3-166-6\_Carbon-1-1.als  
single pulse decoupled gated NOE  
30-05-2012 01:24:27  
13C

carbon.jp  
100.53 MHz  
5.35 KHz  
5.86 Hz  
26214  
25125.63 Hz  
2048  
1.0433 sec  
2.0000 sec  
2.67 usec  
1H  
23.8 c  
CDCL3  
0.00 ppm  
1.20 Hz  
60

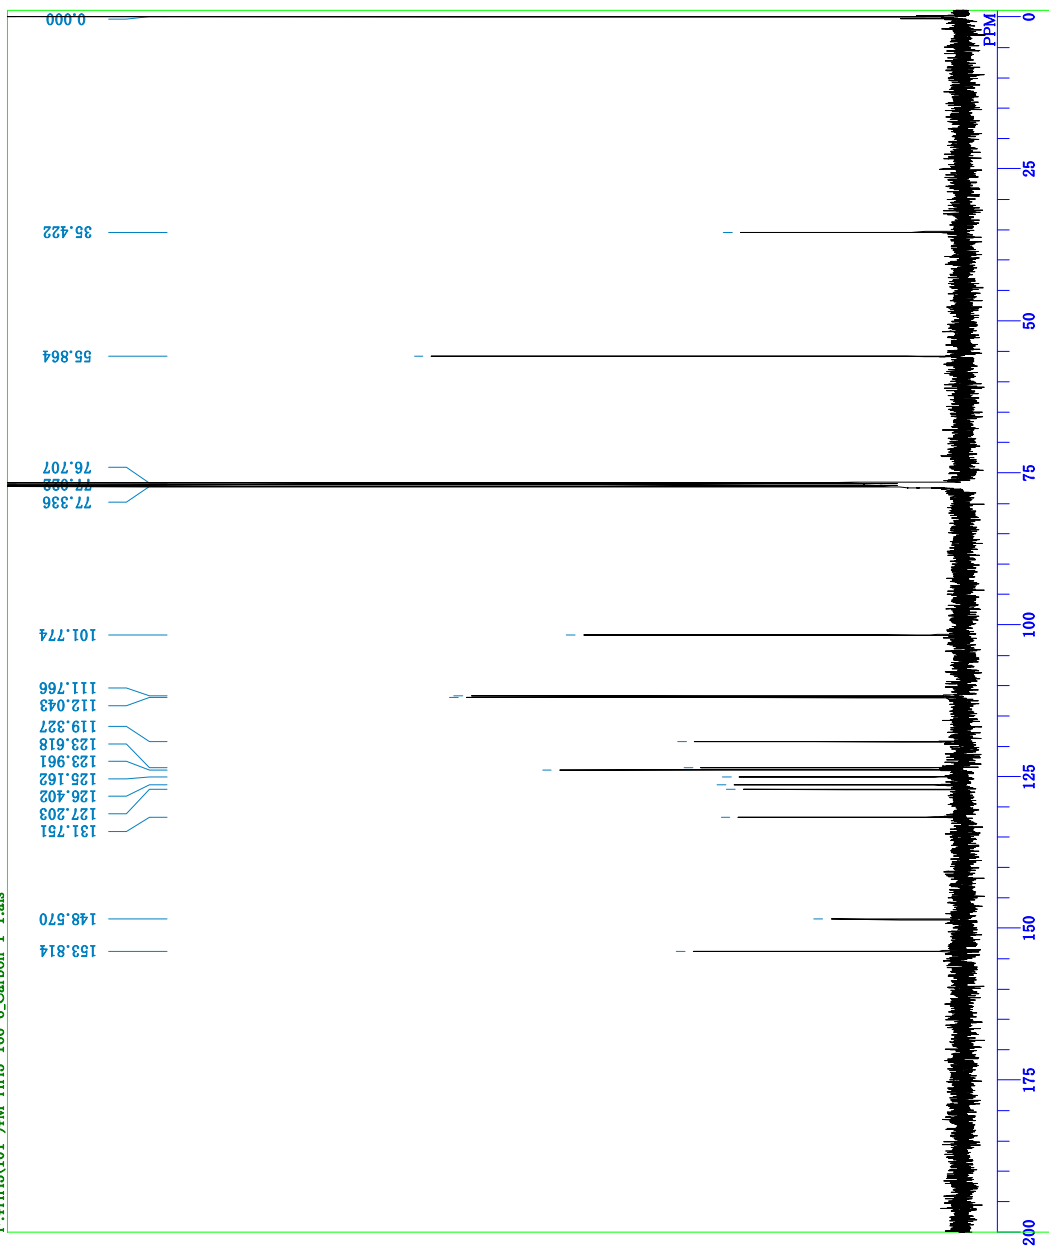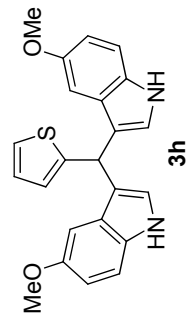

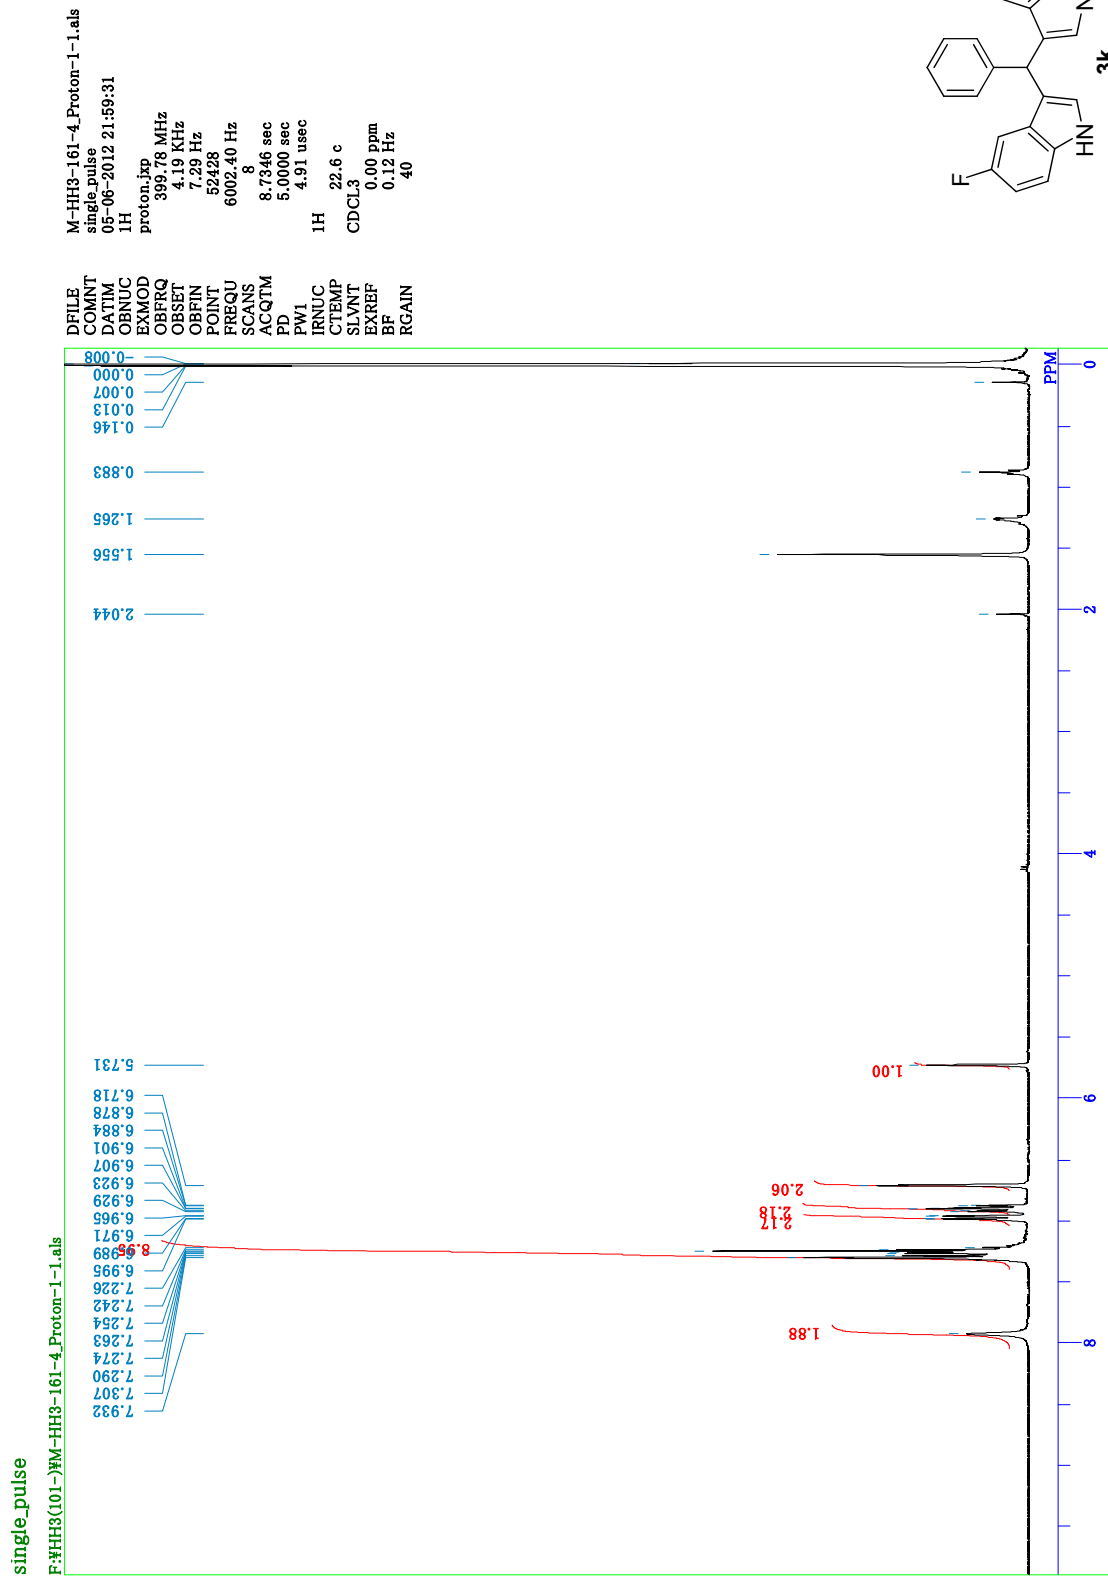

single pulse decoupled gated NOE

F:\HH3(101)\M-HH3-161-4\_Carbon-1-1.als

DFILE  
COMNT  
DATIM  
OBNUC  
EXMOD  
OBREQ  
OBSET  
OBFIN  
POINT  
FREQU  
SCANS  
ACQTM  
PD  
PW1  
IRNUC  
CTEMP  
SLVNT  
EXREF  
BF  
RGAIN

M-HH3-161-4\_Carbon-1-1.als  
single pulse decoupled gated NOE  
05-06-2012 22:03:51  
13C

carbon.jpg  
100.53 MHz  
5.35 KHz  
5.86 Hz  
26214  
25125.63 Hz  
2048  
1.0433 sec  
2.0000 sec  
2.67 usec  
1H  
23.2 c  
CDCL3  
0.00 ppm  
1.20 Hz  
60

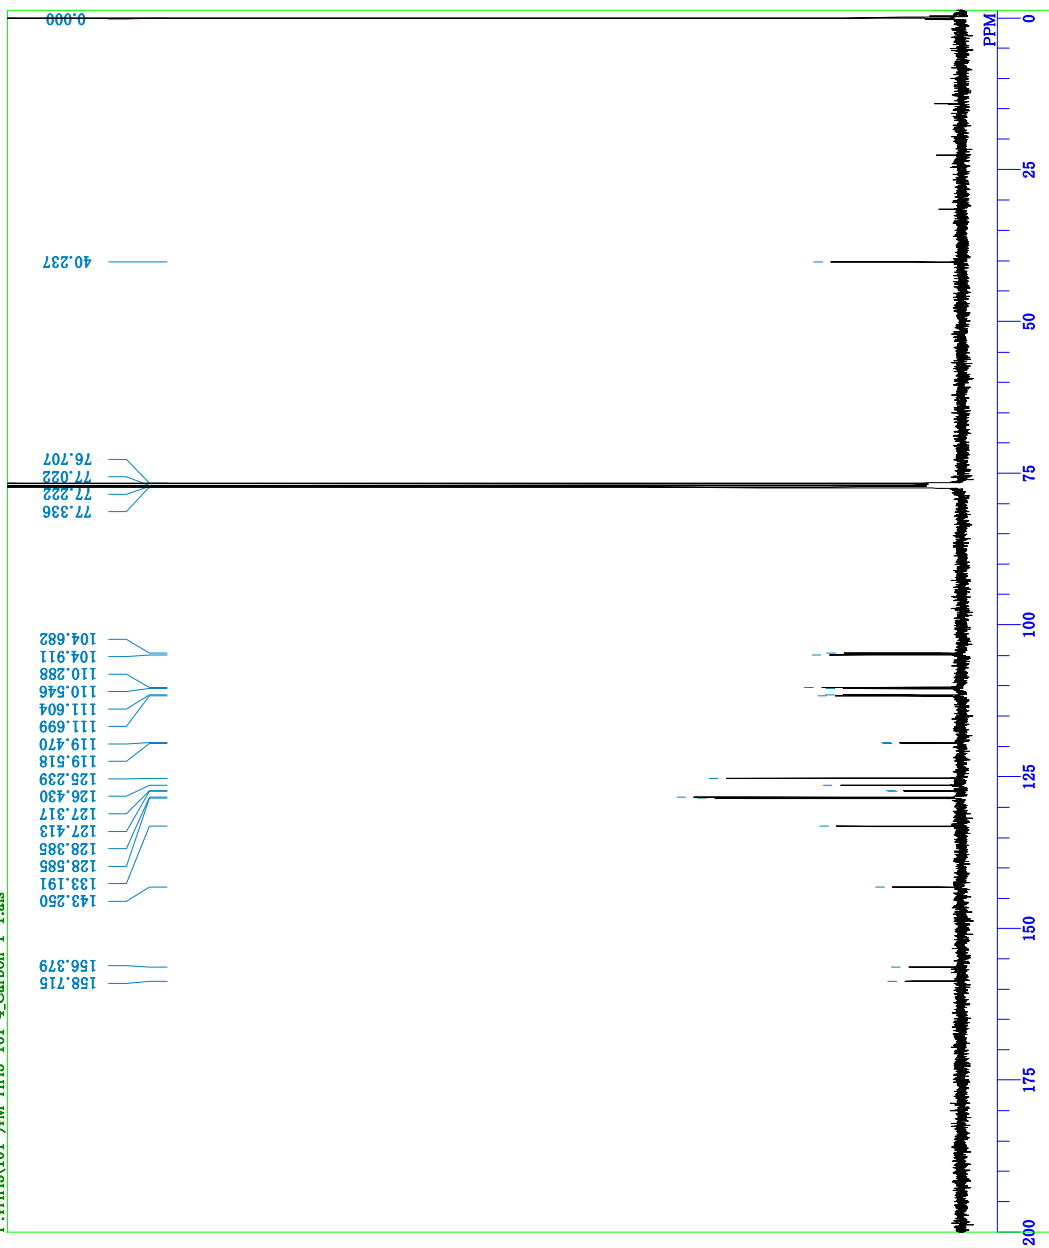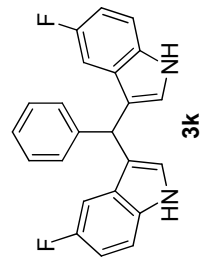

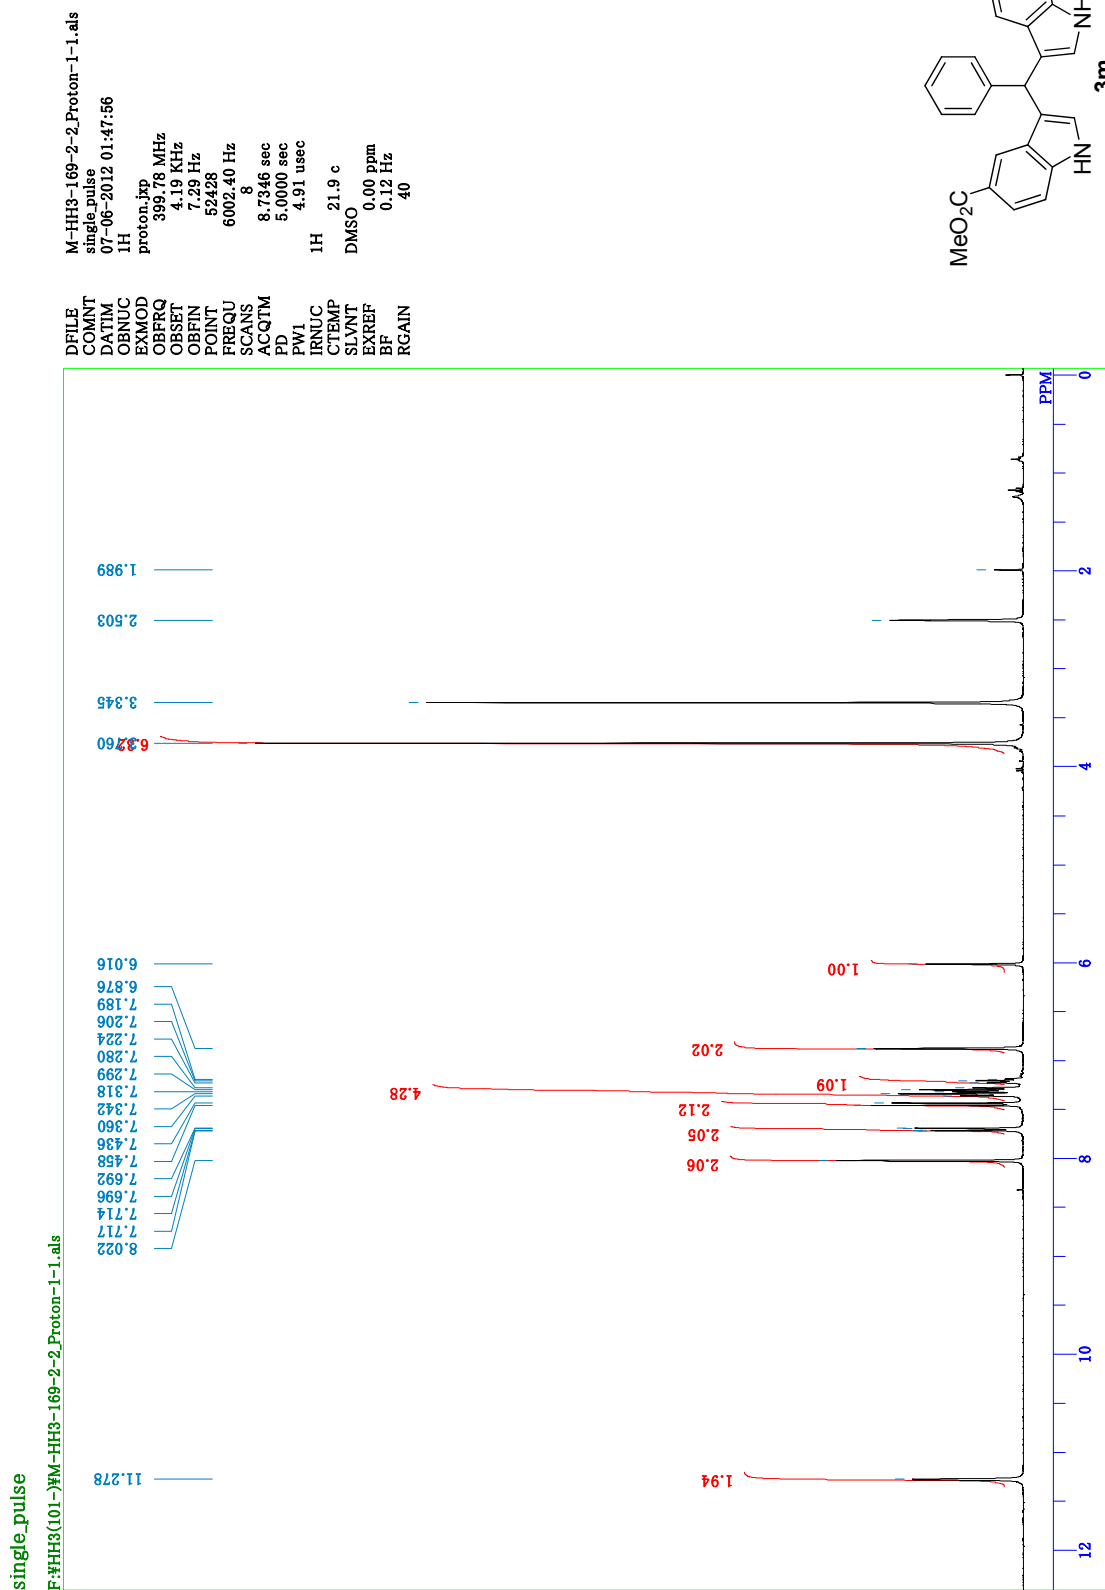

single pulse decoupled gated NOE

F:\HH3(101-)\M-HH3-169-2-2\_Carbon-1-1.als

DFILE  
COMNT  
DATIM  
OBNUC  
EXMOD  
OBPRQ  
OBSET  
OBFIN  
POINT  
FREQU  
SCANS  
ACQTM  
PD  
PW1  
IRNUC  
CTEMP  
SLVNT  
EXREF  
BF  
RGAIN

M-HH3-169-2-2\_Carbon-1-1.als  
single pulse decoupled gated NOE  
07-06-2012 01:52:17  
13C  
carbon.jrp

100.53 MHz  
5.35 KHz  
5.86 Hz  
26214  
25125.63 Hz  
1024  
1.0433 sec  
2.0000 sec  
2.67 usec  
1H  
22.3 c  
DMSO  
39.50 ppm  
1.20 Hz  
60

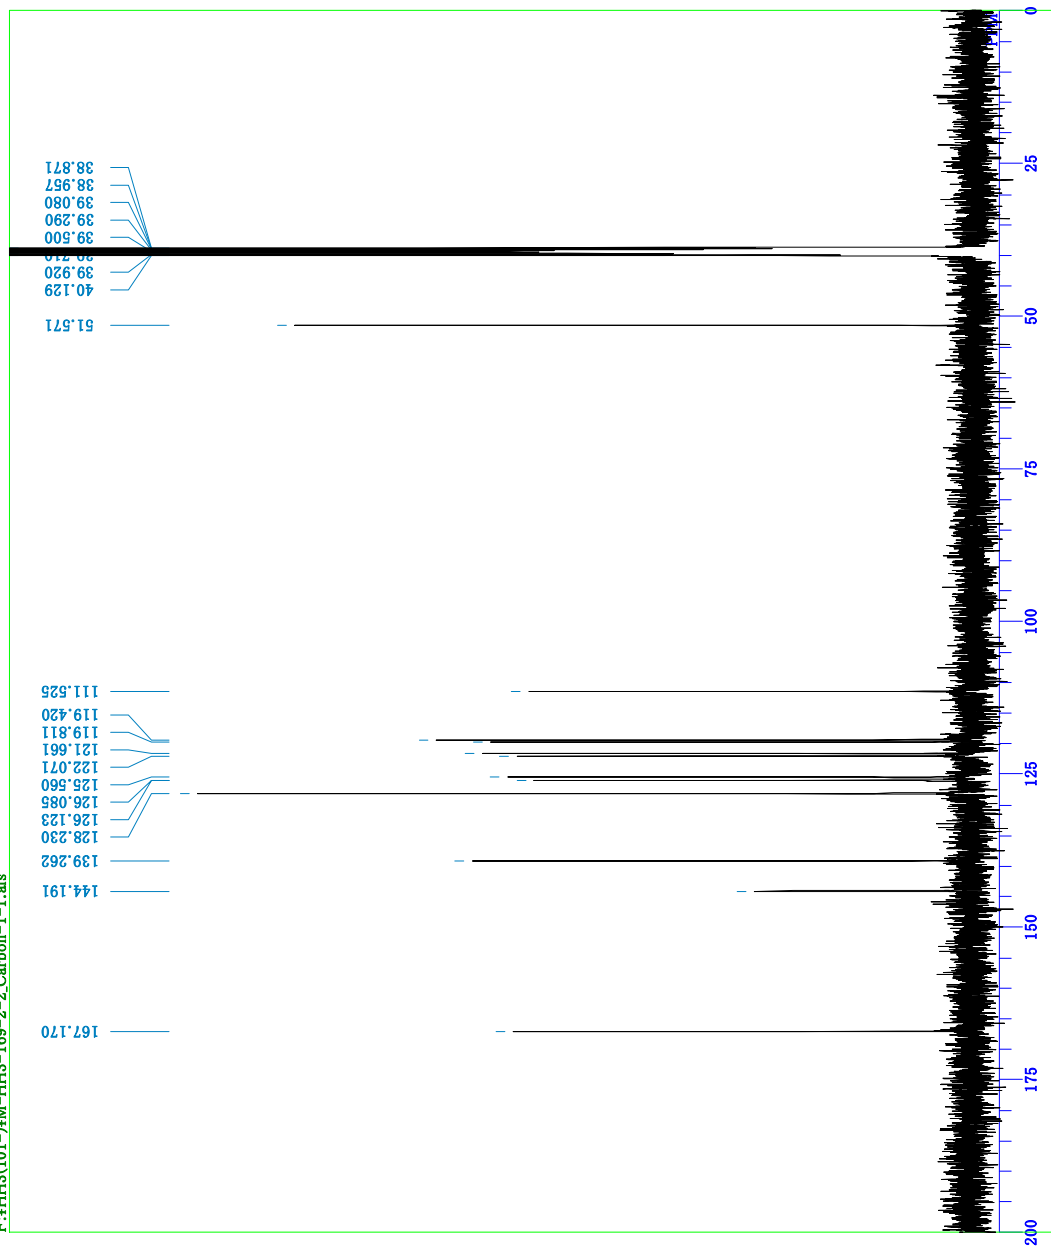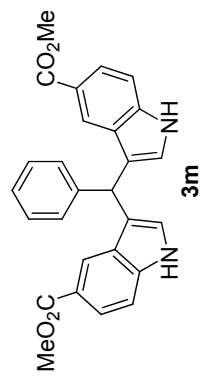

Supplement: c2ra21887a.pdf [file c2ra21887a.pdf]
